# Supplementary material for: Mathematical Analysis of the Healthcare Treatment of 215 Patients with Coronary Heart Disease
Source: Hindawi journal article supplement (doi:10.1155/2022/2134472), 2022-05-24
Supplement: f1 [file 2134472.f1.pdf]

| <b>Date of admission</b> | <b>age</b> | <b>gender</b> | <b>area</b> | <b>Systolic blood pressure (first admission)</b> | <b>Diastolic pressure (first admission)</b> | <b>VTE score</b>  |
|--------------------------|------------|---------------|-------------|--------------------------------------------------|---------------------------------------------|-------------------|
| 2021-06-30               | 54         | male          | rural       | 108                                              | 75                                          | Low risk (0-2)    |
| 2021-06-22               | 58         | female        | rural       | 121                                              | 68                                          | Low risk (0-2)    |
| 2021/6/26                | 66         | male          | urban       | 103                                              | 57                                          | high risk (5-8)   |
| 2021/7/5                 | 55         | male          | rural       | 112                                              | 81                                          | Low risk (0-2)    |
| 2021/7/5                 | 68         | female        | urban       | 145                                              | 81                                          | Low risk (0-2)    |
| 2021/6/25                | 69         | female        | urban       | 129                                              | 79                                          | high risk (5-8)   |
| 2021-06-23               | 43         | male          | rural       | 150                                              | 80                                          | high risk (5-8)   |
| 2021/7/4                 | 68         | female        | rural       | 104                                              | 61                                          | high risk (5-8)   |
| 2021/7/4                 | 72         | female        | urban       | 162                                              | 78                                          | Low risk (0-2)    |
| 2021/7/5                 | 70         | female        | rural       | 164                                              | 84                                          | medium risk (3-4) |
| 2021-07-06               | 76         | male          | rural       | 105                                              | 69                                          | medium risk (3-4) |
| 2021-06-26               | 61         | male          | urban       | 165                                              | 113                                         | medium risk (3-4) |
| 2021-07-06               | 73         | male          | urban       | 124                                              | 64                                          | Low risk (0-2)    |
| 2021-07-09               | 62         | male          | urban       | 128                                              | 87                                          | Low risk (0-2)    |
| 2021-07-10               | 71         | male          | rural       | 158                                              | 68                                          | high risk (5-8)   |
| 2021-06-24               | 67         | male          | urban       | 156                                              | 87                                          | high risk (5-8)   |
| 2021-07-06               | 69         | male          | urban       | 97                                               | 51                                          | Low risk (0-2)    |
| 2021-07-13               | 74         | male          | urban       | 135                                              | 77                                          | Low risk (0-2)    |
| 2021-07-14               | 41         | male          | urban       | 138                                              | 98                                          | Low risk (0-2)    |
| 2021-07-12               | 71         | male          | rural       | 102                                              | 54                                          | medium risk (3-4) |
| 2021-07-12               | 70         | male          | rural       | 96                                               | 62                                          | Low risk (0-2)    |
| 2021-07-08               | 56         | female        | rural       | 158                                              | 86                                          | high risk (5-8)   |
| 2021-07-13               | 63         | male          | rural       | 105                                              | 65                                          | Low risk (0-2)    |
| 2021-07-16               | 63         | male          | urban       | 143                                              | 94                                          | medium risk (3-4) |
| 2021-07-10               | 61         | female        | rural       | 131                                              | 75                                          | high risk (5-8)   |
| 2021-07-16               | 58         | male          | urban       | 140                                              | 100                                         | high risk (5-8)   |
| 2021-07-19               | 38         | male          | urban       | 112                                              | 71                                          | Low risk (0-2)    |
| 2021-07-14               | 70         | male          | rural       | 125                                              | 76                                          | high risk (5-8)   |
| 2021-07-20               | 75         | female        | urban       | 113                                              | 59                                          | medium risk (3-4) |
| 2021-07-19               | 90         | male          | urban       | 104                                              | 63                                          | high risk (5-8)   |
| 2021-07-22               | 56         | female        | urban       | 163                                              | 60                                          | Low risk (0-2)    |
| 2021-07-22               | 57         | male          | rural       | 132                                              | 78                                          | Low risk (0-2)    |
| 2021-07-23               | 70         | female        | urban       | 124                                              | 84                                          | Low risk (0-2)    |
| 2021-07-22               | 72         | female        | urban       | 155                                              | 74                                          | Low risk (0-2)    |
| 2021-07-23               | 71         | female        | urban       | 156                                              | 92                                          | Low risk (0-2)    |
| 2021-07-23               | 58         | male          | urban       | 110                                              | 76                                          | Low risk (0-2)    |
| 2021-07-25               | 78         | male          | rural       | 103                                              | 69                                          | medium risk (3-4) |
| 2021-07-24               | 74         | male          | rural       | 136                                              | 82                                          | high risk (5-8)   |
| 2021/7/23                | 65         | male          | rural       | 128                                              | 86                                          | Low risk (0-2)    |
| 2021-07-28               | 49         | male          | urban       | 194                                              | 102                                         | Low risk (0-2)    |
| 2021-06-29               | 42         | male          | urban       | 157                                              | 94                                          | Low risk (0-2)    |
| 2021-07-01               | 69         | male          | urban       | 175                                              | 76                                          | medium risk (3-4) |
| 2021-07-27               | 60         | female        | urban       | 141                                              | 77                                          | Low risk (0-2)    |
| 2021-07-29               | 58         | male          | rural       | 160                                              | 87                                          | Low risk (0-2)    |
| 2021-07-29               | 72         | male          | urban       | 133                                              | 63                                          | medium risk (3-4) |
| 2021-08-17               | 84         | female        | urban       | 143                                              | 71                                          | medium risk (3-4) |
| 2021-07-29               | 84         | male          | urban       | 146                                              | 66                                          | high risk (5-8)   |
| 2021-08-18               | 77         | female        | urban       | 152                                              | 82                                          | medium risk (3-4) |
| 2021-08-03               | 57         | male          | urban       | 115                                              | 71                                          | Low risk (0-2)    |
| 2021-07-18               | 71         | female        | rural       | 108                                              | 65                                          | high risk (5-8)   |
| 2021-08-17               | 59         | male          | rural       | 125                                              | 66                                          | Low risk (0-2)    |

|            |    |        |       |     |     |                   |
|------------|----|--------|-------|-----|-----|-------------------|
| 2021-07-30 | 50 | male   | urban | 138 | 98  | Low risk (0-2)    |
| 2021-08-21 | 32 | female | urban | 111 | 64  | Low risk (0-2)    |
| 2021-08-01 | 72 | female | rural | 119 | 79  | high risk (5-8)   |
| 2021-08-20 | 55 | female | rural | 144 | 75  | Low risk (0-2)    |
| 2021-08-02 | 49 | female | urban | 86  | 59  | high risk (5-8)   |
| 2021-08-07 | 73 | male   | urban | 140 | 90  | Low risk (0-2)    |
| 2021-08-16 | 71 | female | urban | 112 | 64  | medium risk (3-4) |
| 2021-08-22 | 65 | female | rural | 140 | 97  | high risk (5-8)   |
| 2021-08-02 | 73 | female | urban | 143 | 76  | Low risk (0-2)    |
| 2021-08-29 | 57 | male   | urban | 113 | 80  | Low risk (0-2)    |
| 2021/8/17  | 73 | female | urban | 129 | 78  | medium risk (3-4) |
| 2021-08-06 | 83 | male   | urban | 131 | 81  | high risk (5-8)   |
| 2021-08-26 | 66 | male   | urban | 89  | 52  | medium risk (3-4) |
| 2021-08-09 | 55 | female | rural | 116 | 76  | Low risk (0-2)    |
| 2021-08-13 | 63 | female | rural | 110 | 75  | Low risk (0-2)    |
| 2021-08-11 | 62 | male   | urban | 109 | 79  | high risk (5-8)   |
| 2021-08-17 | 69 | female | urban | 126 | 79  | Low risk (0-2)    |
| 2021-08-12 | 50 | male   | urban | 134 | 82  | medium risk (3-4) |
| 2021-08-26 | 77 | female | rural | 127 | 75  | high risk (5-8)   |
| 2021-08-24 | 64 | female | urban | 108 | 70  | Low risk (0-2)    |
| 2021-08-30 | 74 | female | urban | 105 | 64  | Low risk (0-2)    |
| 2021-08-26 | 59 | male   | rural | 152 | 82  | Low risk (0-2)    |
| 2021-08-24 | 65 | female | rural | 146 | 74  | Low risk (0-2)    |
| 2021-08-30 | 86 | female | urban | 142 | 83  | medium risk (3-4) |
| 2021-08-31 | 64 | female | urban | 120 | 70  | medium risk (3-4) |
| 2021-08-31 | 81 | female | urban | 115 | 74  | medium risk (3-4) |
| 2021-09-02 | 58 | male   | rural | 136 | 82  | Low risk (0-2)    |
| 2021-08-30 | 47 | male   | urban | 131 | 84  | Low risk (0-2)    |
| 2021-09-07 | 56 | female | rural | 110 | 69  | Low risk (0-2)    |
| 2021-09-03 | 50 | male   | rural | 92  | 62  | Low risk (0-2)    |
| 2021-09-06 | 57 | male   | urban | 150 | 102 | Low risk (0-2)    |
| 2021-09-06 | 66 | female | urban | 129 | 80  | Low risk (0-2)    |
| 2021-08-30 | 71 | female | rural | 126 | 73  | Low risk (0-2)    |
| 2021-08-15 | 78 | female | urban | 159 | 77  | medium risk (3-4) |
| 2021-09-07 | 66 | male   | urban | 185 | 91  | high risk (5-8)   |
| 2021-09-01 | 67 | male   | urban | 156 | 96  | high risk (5-8)   |
| 2021-08-31 | 71 | female | rural | 118 | 65  | medium risk (3-4) |
| 2021-09-02 | 74 | male   | rural | 149 | 85  | Low risk (0-2)    |
| 2021-09-08 | 44 | male   | urban | 139 | 80  | Low risk (0-2)    |
| 2021-09-07 | 70 | male   | urban | 121 | 74  | Low risk (0-2)    |
| 2021-09-08 | 58 | male   | rural | 116 | 78  | Low risk (0-2)    |
| 2021-09-03 | 76 | female | urban | 137 | 57  | medium risk (3-4) |
| 2021-09-06 | 66 | male   | urban | 160 | 96  | high risk (5-8)   |
| 2021-09-10 | 60 | female | urban | 140 | 84  | Low risk (0-2)    |
| 2021-09-15 | 72 | male   | urban | 132 | 74  | medium risk (3-4) |
| 2021-09-15 | 64 | female | urban | 127 | 76  | high risk (5-8)   |
| 2021-09-17 | 52 | male   | rural | 139 | 105 | high risk (5-8)   |
| 2021-09-21 | 78 | female | urban | 161 | 65  | high risk (5-8)   |
| 2021-09-24 | 58 | male   | rural | 138 | 81  | medium risk (3-4) |
| 2021-09-22 | 74 | male   | rural | 144 | 71  | medium risk (3-4) |
| 2021-09-22 | 76 | female | urban | 156 | 82  | high risk (5-8)   |
| 2021-09-24 | 61 | female | urban | 145 | 87  | Low risk (0-2)    |
| 2021-09-24 | 71 | female | rural | 113 | 59  | high risk (5-8)   |
| 2021/9/16  | 73 | female | rural | 137 | 69  | Low risk (0-2)    |
| 2021-09-25 | 67 | male   | rural | 126 | 75  | Low risk (0-2)    |
| 2021-09-22 | 75 | male   | rural | 136 | 68  | medium risk (3-4) |

|            |    |        |       |     |    |                   |
|------------|----|--------|-------|-----|----|-------------------|
| 2021-09-25 | 68 | female | rural | 135 | 82 | high risk (5-8)   |
| 2021-09-25 | 56 | female | urban | 125 | 72 | Low risk (0-2)    |
| 2021-09-27 | 68 | male   | urban | 104 | 54 | Low risk (0-2)    |
| 2021-09-28 | 72 | male   | rural | 117 | 75 | high risk (5-8)   |
| 2021-09-28 | 67 | male   | urban | 131 | 83 | medium risk (3-4) |
| 2021-10-01 | 46 | male   | urban | 146 | 94 | Low risk (0-2)    |
| 2021-10-07 | 68 | male   | urban | 137 | 70 | Low risk (0-2)    |
| 2021-10-11 | 79 | male   | rural | 165 | 95 | medium risk (3-4) |
| 2021-10-10 | 55 | male   | rural | 117 | 74 | medium risk (3-4) |
| 2021-10-11 | 86 | female | rural | 154 | 60 | medium risk (3-4) |
| 2021-10-13 | 55 | male   | rural | 108 | 76 | Low risk (0-2)    |
| 2021-10-08 | 58 | male   | rural | 143 | 92 | Low risk (0-2)    |
| 2021-10-09 | 79 | female | urban | 105 | 58 | medium risk (3-4) |
| 2021-10-03 | 80 | female | rural | 134 | 67 | high risk (5-8)   |
| 2021-10-14 | 67 | female | urban | 151 | 73 | Low risk (0-2)    |
| 2021-10-12 | 65 | male   | urban | 121 | 78 | high risk (5-8)   |
| 2021-10-13 | 65 | male   | urban | 137 | 88 | medium risk (3-4) |
| 2021-10-16 | 70 | male   | urban | 119 | 67 | high risk (5-8)   |
| 2021-10-08 | 56 | male   | rural | 124 | 78 | Low risk (0-2)    |
| 2021-10-15 | 71 | female | rural | 149 | 84 | medium risk (3-4) |
| 2021-10-10 | 94 | male   | rural | 136 | 65 | high risk (5-8)   |
| 2021-10-19 | 59 | male   | urban | 128 | 76 | Low risk (0-2)    |
| 2021-10-18 | 79 | female | rural | 114 | 62 | medium risk (3-4) |
| 2021-10-11 | 71 | male   | rural | 180 | 87 | Low risk (0-2)    |
| 2021-10-15 | 74 | female | rural | 153 | 83 | Low risk (0-2)    |
| 2021-10-12 | 77 | female | urban | 142 | 72 | medium risk (3-4) |
| 2021-10-25 | 77 | female | urban | 117 | 51 | medium risk (3-4) |
| 2021-10-29 | 49 | female | rural | 147 | 93 | Low risk (0-2)    |
| 2021-10-25 | 51 | male   | urban | 103 | 67 | Low risk (0-2)    |
| 2021-10-26 | 70 | male   | rural | 138 | 72 | Low risk (0-2)    |
| 2021-10-27 | 69 | female | urban | 104 | 53 | Low risk (0-2)    |
| 2021-10-25 | 79 | female | urban | 138 | 70 | medium risk (3-4) |
| 2021-10-26 | 38 | male   | urban | 121 | 83 | Low risk (0-2)    |
| 2021-10-28 | 56 | male   | urban | 97  | 61 | high risk (5-8)   |
| 2021-10-22 | 77 | male   | rural | 99  | 54 | medium risk (3-4) |
| 2021-10-29 | 56 | male   | rural | 121 | 79 | high risk (5-8)   |
| 2021-10-27 | 59 | male   | rural | 140 | 83 | Low risk (0-2)    |
| 2021-10-23 | 67 | male   | urban | 157 | 98 | Low risk (0-2)    |
| 2021-10-27 | 61 | male   | urban | 104 | 59 | high risk (5-8)   |
| 2021-10-29 | 75 | male   | rural | 112 | 59 | high risk (5-8)   |
| 2021-10-28 | 73 | female | rural | 154 | 71 | Low risk (0-2)    |
| 2021-11-02 | 64 | male   | urban | 137 | 86 | Low risk (0-2)    |
| 2021-11-01 | 46 | male   | rural | 124 | 55 | high risk (5-8)   |
| 2021-10-27 | 69 | male   | rural | 146 | 79 | Low risk (0-2)    |
| 2021-10-28 | 67 | female | urban | 97  | 72 | high risk (5-8)   |
| 2021-11-06 | 59 | male   | rural | 124 | 81 | Low risk (0-2)    |
| 2021-11-03 | 71 | male   | urban | 115 | 73 | medium risk (3-4) |
| 2021-11-04 | 55 | male   | urban | 129 | 81 | Low risk (0-2)    |
| 2021-11-08 | 64 | male   | urban | 128 | 71 | Low risk (0-2)    |
| 2021-11-04 | 82 | female | urban | 145 | 82 | medium risk (3-4) |
| 2021-11-11 | 67 | female | rural | 152 | 94 | medium risk (3-4) |
| 2021-11-08 | 65 | male   | urban | 128 | 76 | medium risk (3-4) |
| 2021-11-04 | 70 | male   | urban | 118 | 73 | high risk (5-8)   |
| 2021-11-13 | 58 | male   | rural | 152 | 76 | Low risk (0-2)    |
| 2021-11-04 | 71 | male   | rural | 134 | 82 | high risk (5-8)   |
| 2021-11-09 | 58 | male   | rural | 153 | 90 | Low risk (0-2)    |

|            |    |        |       |     |     |                   |
|------------|----|--------|-------|-----|-----|-------------------|
| 2021-11-13 | 43 | male   | rural | 114 | 81  | Low risk (0-2)    |
| 2021-11-11 | 61 | female | urban | 142 | 84  | high risk (5-8)   |
| 2021-10-20 | 55 | male   | urban | 140 | 80  | Low risk (0-2)    |
| 2021-11-16 | 58 | female | urban | 124 | 73  | Low risk (0-2)    |
| 2021-11-18 | 64 | male   | rural | 117 | 74  | high risk (5-8)   |
| 2021-11-22 | 68 | male   | rural | 111 | 68  | Low risk (0-2)    |
| 2021-11-16 | 61 | male   | urban | 108 | 73  | Low risk (0-2)    |
| 2021-11-18 | 66 | male   | urban | 122 | 82  | Low risk (0-2)    |
| 2021-11-11 | 67 | female | urban | 167 | 66  | Low risk (0-2)    |
| 2021-11-19 | 77 | male   | urban | 127 | 65  | medium risk (3-4) |
| 2021-11-23 | 36 | male   | urban | 140 | 102 | Low risk (0-2)    |
| 2021-11-23 | 64 | male   | urban | 108 | 74  | medium risk (3-4) |
| 2021-12-04 | 73 | male   | urban | 117 | 66  | Low risk (0-2)    |
| 2021-12-20 | 68 | male   | rural | 132 | 62  | Low risk (0-2)    |
| 2021-12-24 | 68 | male   | urban | 135 | 88  | Low risk (0-2)    |
| 2021-12-27 | 69 | male   | urban | 130 | 73  | Low risk (0-2)    |
| 2021-12-24 | 62 | female | urban | 127 | 69  | Low risk (0-2)    |
| 2021-11-25 | 61 | female | rural | 134 | 74  | medium risk (3-4) |
| 2021-11-25 | 69 | female | rural | 144 | 78  | high risk (5-8)   |
| 2021-11-29 | 56 | male   | rural | 126 | 97  | Low risk (0-2)    |
| 2021-11-29 | 71 | male   | urban | 102 | 63  | medium risk (3-4) |
| 2021-11-29 | 54 | male   | rural | 120 | 80  | Low risk (0-2)    |
| 2021-11-30 | 65 | female | urban | 125 | 83  | medium risk (3-4) |
| 2021-11-29 | 59 | female | rural | 125 | 76  | high risk (5-8)   |
| 2021-11-27 | 55 | male   | urban | 144 | 69  | high risk (5-8)   |
| 2021-12-01 | 66 | female | urban | 143 | 89  | medium risk (3-4) |
| 2021-12-01 | 43 | male   | urban | 159 | 96  | Low risk (0-2)    |
| 2021-12-02 | 74 | male   | urban | 160 | 102 | medium risk (3-4) |
| 2021-11-25 | 75 | female | urban | 160 | 101 | medium risk (3-4) |
| 2021-12-01 | 72 | male   | urban | 164 | 96  | medium risk (3-4) |
| 2021-11-30 | 71 | female | urban | 101 | 61  | Low risk (0-2)    |
| 2021-12-02 | 68 | male   | urban | 110 | 74  | Low risk (0-2)    |
| 2021-12-04 | 65 | male   | urban | 127 | 79  | Low risk (0-2)    |
| 2021-12-01 | 65 | female | urban | 160 | 95  | Low risk (0-2)    |
| 2021-12-02 | 75 | male   | urban | 112 | 72  | medium risk (3-4) |
| 2021-12-08 | 61 | female | rural | 126 | 77  | medium risk (3-4) |
| 2021-12-10 | 70 | male   | urban | 155 | 77  | medium risk (3-4) |
| 2021-12-13 | 73 | male   | urban | 125 | 85  | medium risk (3-4) |
| 2021-12-09 | 67 | male   | rural | 140 | 70  | Low risk (0-2)    |
| 2021-12-17 | 84 | female | urban | 124 | 65  | medium risk (3-4) |
| 2021-12-15 | 71 | female | urban | 154 | 71  | medium risk (3-4) |
| 2021-12-13 | 58 | female | rural | 90  | 70  | Low risk (0-2)    |
| 2021-12-13 | 67 | male   | urban | 131 | 76  | medium risk (3-4) |
| 2021-12-17 | 57 | male   | urban | 175 | 112 | Low risk (0-2)    |
| 2021-12-17 | 65 | female | rural | 136 | 66  | Low risk (0-2)    |
| 2021-12-18 | 55 | male   | rural | 132 | 78  | Low risk (0-2)    |
| 2021-12-17 | 64 | male   | urban | 128 | 88  | medium risk (3-4) |
| 2021-12-22 | 58 | female | urban | 128 | 72  | Low risk (0-2)    |
| 2021-12-20 | 71 | female | urban | 117 | 91  | medium risk (3-4) |
| 2021-12-20 | 74 | female | rural | 136 | 63  | Low risk (0-2)    |
| 2021-12-20 | 80 | female | urban | 124 | 58  | medium risk (3-4) |
| 2021-12-22 | 61 | male   | urban | 169 | 89  | Low risk (0-2)    |

| Coronary heart disease type              | Cardiac function classification | Any history of atherosclerotic cardiovascular disease (ASCVD) | Complication | Type of diabetes |
|------------------------------------------|---------------------------------|---------------------------------------------------------------|--------------|------------------|
| Unstable angina pectoris                 | II                              | N                                                             | Y            | II               |
| Ischemic cardiomyopathy                  | I                               | Y                                                             | Y            | II               |
| Non-ST-segment elevation angina pectoris | II                              | Y                                                             | Y            | II               |
| ST-segment elevation angina pectoris     | I                               | Y                                                             | N            | II               |
| Unstable angina pectoris                 | II                              | Y                                                             | Y            | II               |
| Unstable angina pectoris                 | II                              | Y                                                             | Y            | II               |
| Unstable angina pectoris                 | III                             | Y                                                             | Y            | II               |
| Unstable angina pectoris                 | I                               | Y                                                             | N            | II               |
| Unstable angina pectoris                 | II                              | Y                                                             | Y            | II               |
| Unstable angina pectoris                 | II                              | Y                                                             | Y            | II               |
| Unstable angina pectoris                 | IV                              | Y                                                             | Y            | II               |
| Unstable angina pectoris                 | II                              | Y                                                             | Y            | II               |
| Unstable angina pectoris                 | III                             | Y                                                             | Y            | II               |
| Unstable angina pectoris                 | II                              | Y                                                             | Y            | II               |
| Unstable angina pectoris                 | III                             | Y                                                             | Y            | II               |
| Non-ST-segment elevation angina pectoris | III                             | Y                                                             | Y            | II               |
| Unstable angina pectoris                 | IV                              | Y                                                             | Y            | II               |
| Unstable angina pectoris                 | II                              | Y                                                             | Y            | II               |
| Unstable angina pectoris                 | I                               | Y                                                             | Y            | II               |
| Unstable angina pectoris                 | III                             | Y                                                             | Y            | II               |
| Unstable angina pectoris                 | I                               | Y                                                             | Y            | II               |
| Unstable angina pectoris                 | II                              | Y                                                             | Y            | II               |
| Unstable angina pectoris                 | II                              | Y                                                             | Y            | II               |
| Unstable angina pectoris                 | I                               | Y                                                             | Y            | II               |
| Unstable angina pectoris                 | I                               | Y                                                             | Y            | II               |
| Unstable angina pectoris                 | II                              | Y                                                             | Y            | II               |
| Unstable angina pectoris                 | I                               | Y                                                             | Y            | II               |
| Non-ST-segment elevation angina pectoris | I                               | Y                                                             | Y            | II               |
| Stable angina pectoris                   | I                               | Y                                                             | Y            | II               |
| Ischemic cardiomyopathy                  | IV                              | Y                                                             | Y            | II               |
| Stable angina pectoris                   | I                               | Y                                                             | Y            | II               |
| Stable angina pectoris                   | II                              | Y                                                             | Y            | II               |
| Unstable angina pectoris                 | II                              | Y                                                             | Y            | II               |
| Unstable angina pectoris                 | II                              | Y                                                             | Y            | II               |
| Unstable angina pectoris                 | II                              | Y                                                             | Y            | II               |
| Unstable angina pectoris                 | II                              | Y                                                             | Y            | II               |
| Unstable angina pectoris                 | III                             | Y                                                             | Y            | II               |
| Ischemic cardiomyopathy                  | II                              | Y                                                             | Y            | II               |
| Ischemic cardiomyopathy                  | II                              | Y                                                             | Y            | II               |
| Ischemic cardiomyopathy                  | IV                              | N                                                             | Y            | II               |
| Unstable angina pectoris                 | I                               | N                                                             | Y            | II               |
| Unstable angina pectoris                 | II                              | Y                                                             | Y            | II               |
| Ischemic cardiomyopathy                  | I                               | Y                                                             | Y            | II               |
| Unstable angina pectoris                 | II                              | Y                                                             | Y            | II               |
| Ischemic cardiomyopathy                  | III                             | Y                                                             | Y            | II               |
| Ischemic cardiomyopathy                  | III                             | Y                                                             | Y            | II               |
| Non-ST-segment elevation angina pectoris | IV                              | Y                                                             | Y            | II               |
| Unstable angina pectoris                 | II                              | Y                                                             | Y            | II               |
| Ischemic cardiomyopathy                  | III                             | Y                                                             | Y            | II               |
| Non-ST-segment elevation angina pectoris | IV                              | Y                                                             | Y            | II               |
| Unstable angina pectoris                 | IV                              | Y                                                             | Y            | II               |

|                                          |     |   |   |    |
|------------------------------------------|-----|---|---|----|
| Unstable angina pectoris                 | II  | Y | Y | II |
| Unstable angina pectoris                 | I   | Y | Y | II |
| Ischemic cardiomyopathy                  | III | Y | N | II |
| Unstable angina pectoris                 | II  | Y | Y | II |
| Ischemic cardiomyopathy                  | III | Y | Y | II |
| Unstable angina pectoris                 | III | Y | Y | II |
| Unstable angina pectoris                 | II  | Y | Y | II |
| Non-ST-segment elevation angina pectoris | II  | Y | Y | II |
| Stable angina pectoris                   | II  | Y | Y | II |
| Unstable angina pectoris                 | III | N | Y | II |
| Unstable angina pectoris                 | II  | Y | Y | II |
| Unstable angina pectoris                 | IV  | Y | Y | II |
| Unstable angina pectoris                 | II  | Y | N | II |
| Unstable angina pectoris                 | I   | Y | Y | 其他 |
| Unstable angina pectoris                 | II  | Y | Y | II |
| Ischemic cardiomyopathy                  | II  | Y | Y | II |
| Unstable angina pectoris                 | I   | Y | Y | II |
| Unstable angina pectoris                 | II  | Y | Y | II |
| Ischemic cardiomyopathy                  | IV  | Y | Y | II |
| Stable angina pectoris                   | II  | Y | N | II |
| Ischemic cardiomyopathy                  | I   | Y | Y | II |
| Unstable angina pectoris                 | I   | Y | Y | II |
| Non-ST-segment elevation angina pectoris | I   | Y | N | II |
| Unstable angina pectoris                 | II  | Y | Y | II |
| Unstable angina pectoris                 | II  | Y | Y | II |
| Unstable angina pectoris                 | II  | Y | N | II |
| Non-ST-segment elevation angina pectoris | I   | Y | Y | II |
| Unstable angina pectoris                 | I   | Y | Y | II |
| Stable angina pectoris                   | II  | Y | N | II |
| Unstable angina pectoris                 | I   | Y | Y | II |
| Unstable angina pectoris                 | II  | Y | Y | II |
| Unstable angina pectoris                 | I   | Y | Y | II |
| Ischemic cardiomyopathy                  | III | Y | N | II |
| Unstable angina pectoris                 | II  | N | N | II |
| Stable angina pectoris                   | III | Y | Y | II |
| Ischemic cardiomyopathy                  | II  | Y | Y | II |
| Unstable angina pectoris                 | III | Y | Y | II |
| Non-ST-segment elevation angina pectoris | I   | Y | Y | II |
| Unstable angina pectoris                 | II  | Y | Y | II |
| Ischemic cardiomyopathy                  | II  | Y | Y | II |
| Unstable angina pectoris                 | II  | Y | Y | II |
| Unstable angina pectoris                 | III | Y | Y | II |
| Unstable angina pectoris                 | II  | Y | Y | II |
| Unstable angina pectoris                 | II  | Y | Y | II |
| Stable angina pectoris                   | II  | Y | Y | II |
| Ischemic cardiomyopathy                  | II  | Y | Y | II |
| Ischemic cardiomyopathy                  | II  | Y | Y | II |
| Non-ST-segment elevation angina pectoris | I   | Y | Y | II |
| Ischemic cardiomyopathy                  | I   | Y | Y | II |
| Unstable angina pectoris                 | III | Y | Y | II |
| Ischemic cardiomyopathy                  | III | Y | Y | II |
| Unstable angina pectoris                 | II  | Y | Y | II |
| Ischemic cardiomyopathy                  | II  | Y | Y | II |
| Unstable angina pectoris                 | II  | Y | Y | II |
| Unstable angina pectoris                 | II  | Y | Y | II |
| Stable angina pectoris                   | II  | Y | Y | II |

|                                          |     |   |   |    |
|------------------------------------------|-----|---|---|----|
| Ischemic cardiomyopathy                  | IV  | Y | Y | II |
| Ischemic cardiomyopathy                  | I   | Y | Y | II |
| Ischemic cardiomyopathy                  | III | Y | Y | II |
| Ischemic cardiomyopathy                  | I   | Y | N | II |
| Non-ST-segment elevation angina pectoris | I   | Y | Y | II |
| Ischemic cardiomyopathy                  | I   | N | Y | II |
| Non-ST-segment elevation angina pectoris | I   | Y | Y | II |
| Unstable angina pectoris                 | II  | Y | Y | II |
| Non-ST-segment elevation angina pectoris | I   | Y | N | II |
| Unstable angina pectoris                 | II  | Y | Y | II |
| Ischemic cardiomyopathy                  | I   | Y | Y | II |
| Non-ST-segment elevation angina pectoris | I   | Y | Y | II |
| Ischemic cardiomyopathy                  | III | Y | Y | II |
| Ischemic cardiomyopathy                  | II  | Y | N | II |
| Unstable angina pectoris                 | I   | Y | Y | II |
| Ischemic cardiomyopathy                  | I   | Y | Y | II |
| Unstable angina pectoris                 | I   | Y | Y | II |
| Ischemic cardiomyopathy                  | I   | Y | Y | II |
| Ischemic cardiomyopathy                  | II  | Y | Y | II |
| Unstable angina pectoris                 | II  | N | Y | II |
| Non-ST-segment elevation angina pectoris | III | Y | Y | II |
| Unstable angina pectoris                 | III | Y | Y | II |
| Unstable angina pectoris                 | III | Y | Y | II |
| Unstable angina pectoris                 | IV  | Y | Y | II |
| Unstable angina pectoris                 | III | Y | Y | II |
| Ischemic cardiomyopathy                  | III | Y | Y | II |
| Unstable angina pectoris                 | III | Y | Y | II |
| Unstable angina pectoris                 | III | N | Y | II |
| Ischemic cardiomyopathy                  | II  | Y | Y | II |
| Unstable angina pectoris                 | II  | Y | Y | II |
| Ischemic cardiomyopathy                  | II  | Y | Y | II |
| Unstable angina pectoris                 | III | Y | Y | II |
| Unstable angina pectoris                 | III | Y | Y | II |
| Ischemic cardiomyopathy                  | II  | Y | Y | II |
| Ischemic cardiomyopathy                  | III | Y | Y | II |
| Ischemic cardiomyopathy                  | III | Y | Y | II |
| Ischemic cardiomyopathy                  | I   | Y | Y | II |
| Unstable angina pectoris                 | I   | Y | Y | II |
| Unstable angina pectoris                 | II  | Y | Y | II |
| Ischemic cardiomyopathy                  | I   | Y | Y | II |
| Unstable angina pectoris                 | III | Y | Y | II |
| Unstable angina pectoris                 | I   | Y | Y | II |
| Ischemic cardiomyopathy                  | I   | Y | Y | II |
| Non-ST-segment elevation angina pectoris | I   | Y | N | II |
| Unstable angina pectoris                 | IV  | Y | Y | II |
| Ischemic cardiomyopathy                  | II  | Y | Y | II |
| Ischemic cardiomyopathy                  | II  | Y | Y | II |
| Unstable angina pectoris                 | II  | Y | Y | II |
| Ischemic cardiomyopathy                  | I   | Y | N | II |
| Unstable angina pectoris                 | II  | Y | Y | II |
| Unstable angina pectoris                 | II  | Y | Y | II |
| Ischemic cardiomyopathy                  | III | Y | Y | II |
| Unstable angina pectoris                 | II  | Y | Y | II |
| Non-ST-segment elevation angina pectoris | II  | Y | Y | II |
| Unstable angina pectoris                 | II  | Y | Y | II |
| Unstable angina pectoris                 | III | Y | Y | II |
| Ischemic cardiomyopathy                  | III | Y | Y | II |

|                                          |     |   |   |    |
|------------------------------------------|-----|---|---|----|
| Non-ST-segment elevation angina pectoris | III | Y | N | II |
| Unstable angina pectoris                 | II  | Y | Y | II |
| Unstable angina pectoris                 | II  | Y | Y | II |
| Unstable angina pectoris                 | III | N | Y | II |
| Non-ST-segment elevation angina pectoris | I   | Y | Y | II |
| Unstable angina pectoris                 | II  | Y | Y | II |
| Ischemic cardiomyopathy                  | II  | Y | Y | II |
| Unstable angina pectoris                 | II  | Y | Y | II |
| Unstable angina pectoris                 | II  | Y | Y | II |
| Unstable angina pectoris                 | III | Y | Y | II |
| Unstable angina pectoris                 | I   | Y | Y | II |
| Unstable angina pectoris                 | II  | N | N | II |
| Ischemic cardiomyopathy                  | IV  | Y | Y | II |
| Non-ST-segment elevation angina pectoris | II  | Y | N | II |
| Unstable angina pectoris                 | II  | Y | Y | II |
| Unstable angina pectoris                 | II  | Y | Y | II |
| Unstable angina pectoris                 | III | Y | Y | II |
| Unstable angina pectoris                 | II  | Y | Y | II |
| Ischemic cardiomyopathy                  | I   | N | Y | II |
| Ischemic cardiomyopathy                  | I   | Y | Y | II |
| Non-ST-segment elevation angina pectoris | I   | Y | N | II |
| Unstable angina pectoris                 | III | Y | Y | II |
| Unstable angina pectoris                 | I   | Y | Y | II |
| Ischemic cardiomyopathy                  | IV  | Y | N | II |
| Ischemic cardiomyopathy                  | III | N | Y | II |
| Unstable angina pectoris                 | II  | N | Y | II |
| Unstable angina pectoris                 | II  | Y | Y | II |
| Unstable angina pectoris                 | II  | Y | Y | II |
| Unstable angina pectoris                 | II  | Y | Y | II |
| Unstable angina pectoris                 | II  | Y | Y | II |
| Non-ST-segment elevation angina pectoris | I   | N | Y | II |
| Unstable angina pectoris                 | II  | Y | N | II |
| Unstable angina pectoris                 | I   | Y | N | II |
| Unstable angina pectoris                 | II  | Y | Y | II |
| Unstable angina pectoris                 | III | Y | Y | II |
| Unstable angina pectoris                 | II  | Y | Y | II |
| Ischemic cardiomyopathy                  | IV  | Y | Y | II |
| Non-ST-segment elevation angina pectoris | I   | Y | Y | II |
| Unstable angina pectoris                 | II  | Y | Y | II |
| Unstable angina pectoris                 | II  | Y | Y | II |
| Unstable angina pectoris                 | III | Y | Y | II |
| Ischemic cardiomyopathy                  | II  | N | N | II |
| Unstable angina pectoris                 | II  | N | N | II |
| Ischemic cardiomyopathy                  | III | Y | Y | II |
| Unstable angina pectoris                 | II  | Y | Y | II |
| Unstable angina pectoris                 | II  | Y | Y | II |
| Unstable angina pectoris                 | III | Y | Y | II |
| Non-ST-segment elevation angina pectoris | II  | Y | Y | II |
| Non-ST-segment elevation angina pectoris | II  | N | Y | II |
| Unstable angina pectoris                 | III | Y | Y | II |
| Unstable angina pectoris                 | II  | Y | Y | II |
| Ischemic cardiomyopathy                  | III | N | Y | II |



| Family history of coronary heart disease | Family history of diabetes | History of gestational diabetes mellitus | Course of diabetes mellitus | Taking lipid-lowering drugs |
|------------------------------------------|----------------------------|------------------------------------------|-----------------------------|-----------------------------|
| Y                                        | N                          | unknown                                  | 4                           | N                           |
| unknown                                  | unknown                    | N                                        | 51                          | Y                           |
| N                                        | N                          | unknown                                  | 10                          | Y                           |
| Y                                        | N                          | unknown                                  | 20                          | N                           |
| N                                        | N                          | N                                        | 10                          | N                           |
| N                                        | N                          | N                                        | 10                          | N                           |
| unknown                                  | unknown                    | unknown                                  | 5                           | Y                           |
| N                                        | N                          | N                                        | 13                          | Y                           |
| N                                        | N                          | N                                        | 10                          | N                           |
| N                                        | N                          | N                                        | 10                          | N                           |
| N                                        | N                          | unknown                                  | 8                           | Y                           |
| N                                        | Y                          | unknown                                  | unknown                     | Y                           |
| unknown                                  | unknown                    | unknown                                  | 30                          | Y                           |
| unknown                                  | unknown                    | unknown                                  | unknown                     | Y                           |
| N                                        | N                          | unknown                                  | unknown                     | Y                           |
| N                                        | N                          | unknown                                  | 20                          | N                           |
| unknown                                  | unknown                    | unknown                                  | 5                           | Y                           |
| unknown                                  | unknown                    | unknown                                  | 5                           | Y                           |
| unknown                                  | unknown                    | unknown                                  | 2                           | N                           |
| N                                        | N                          | unknown                                  | 12                          | N                           |
| unknown                                  | unknown                    | unknown                                  | unknown                     | N                           |
| N                                        | N                          | N                                        | 12                          | Y                           |
| unknown                                  | unknown                    | unknown                                  | 5                           | Y                           |
| N                                        | N                          | unknown                                  | 16                          | N                           |
| N                                        | N                          | N                                        | 5                           | N                           |
| unknown                                  | unknown                    | unknown                                  | 6                           | N                           |
| N                                        | Y                          | unknown                                  | unknown                     | Y                           |
| N                                        | N                          | unknown                                  | unknown                     | N                           |
| N                                        | N                          | N                                        | 10                          | N                           |
| N                                        | Y                          | unknown                                  | 21                          | N                           |
| N                                        | N                          | N                                        | unknown                     | N                           |
| N                                        | N                          | unknown                                  | unknown                     | N                           |
| unknown                                  | unknown                    | N                                        | 11                          | Y                           |
| N                                        | N                          | N                                        | 2                           | N                           |
| N                                        | N                          | N                                        | 1                           | N                           |
| N                                        | N                          | unknown                                  | 10                          | N                           |
| N                                        | N                          | unknown                                  | unknown                     | Y                           |
| N                                        | N                          | unknown                                  | 12                          | N                           |
| unknown                                  | unknown                    | unknown                                  | 5                           | N                           |
| N                                        | Y                          | unknown                                  | 20                          | N                           |
| Y                                        | N                          | unknown                                  | 10                          | N                           |
| N                                        | N                          | unknown                                  | 30                          | N                           |
| N                                        | N                          | N                                        | 6                           | N                           |
| N                                        | N                          | unknown                                  | 0.3                         | Y                           |
| unknown                                  | unknown                    | unknown                                  | 20                          | Y                           |
| unknown                                  | unknown                    | N                                        | 21                          | Y                           |
| unknown                                  | unknown                    | unknown                                  | 10                          | Y                           |
| Y                                        | N                          | N                                        | unknown                     | N                           |
| unknown                                  | unknown                    | unknown                                  | unknown                     | Y                           |
| N                                        | N                          | N                                        | 20                          | N                           |
| N                                        | N                          | unknown                                  | 3                           | N                           |

|         |         |         |         |   |
|---------|---------|---------|---------|---|
| N       | N       | unknown | unknown | N |
| N       | N       | N       | 10      | N |
| N       | N       | N       | unknown | N |
| unknown | unknown | N       | 3       | N |
| N       | N       | N       | unknown | Y |
| unknown | unknown | unknown | 10      | Y |
| unknown | N       | N       | unknown | N |
| N       | N       | N       | 1       | N |
| N       | Y       | N       | 30      | N |
| N       | Y       | unknown | 4       | N |
| unknown | unknown | N       | 5       | Y |
| unknown | unknown | unknown | unknown | Y |
| unknown | unknown | unknown | unknown | Y |
| N       | N       | N       | unknown | Y |
| N       | N       | N       | 9       | N |
| N       | N       | unknown | 10      | N |
| unknown | unknown | N       | unknown | Y |
| unknown | unknown | unknown | unknown | Y |
| unknown | unknown | N       | 20      | N |
| N       | N       | N       | unknown | N |
| unknown | unknown | N       | 9       | N |
| N       | N       | unknown | 5       | N |
| N       | N       | N       | 10      | N |
| N       | N       | N       | 6       | N |
| unknown | unknown | N       | unknown | Y |
| N       | N       | N       | 12      | Y |
| N       | Y       | unknown | 22      | N |
| N       | Y       | unknown | 2       | N |
| unknown | unknown | N       | 1       | Y |
| N       | N       | unknown | 10      | N |
| unknown | unknown | unknown | 8       | Y |
| N       | N       | N       | 1       | N |
| N       | Y       | N       | 10      | N |
| unknown | unknown | N       | 27      | N |
| unknown | unknown | unknown | unknown | N |
| N       | N       | unknown | unknown | N |
| N       | N       | N       | unknown | N |
| N       | Y       | unknown | unknown | N |
| unknown | unknown | unknown | 0.8     | Y |
| N       | Y       | unknown | 5       | N |
| unknown | unknown | unknown | 10      | N |
| unknown | unknown | N       | 3       | Y |
| Y       | Y       | unknown | 10      | N |
| unknown | unknown | N       | unknown | Y |
| unknown | unknown | unknown | 10      | Y |
| N       | N       | N       | 3       | N |
| N       | N       | unknown | 6       | N |
| N       | N       | N       | 10      | N |
| N       | N       | unknown | 3       | N |
| N       | N       | unknown | 3       | N |
| unknown | unknown | N       | 10      | Y |
| unknown | unknown | N       | 10      | N |
| N       | N       | N       | unknown | N |
| N       | N       | N       | unknown | N |
| N       | N       | unknown | 9       | Y |
| unknown | unknown | unknown | 8       | Y |

|         |         |         |         |   |
|---------|---------|---------|---------|---|
| N       | N       | N       | 2       | N |
| N       | N       | N       | 5       | N |
| unknown | unknown | unknown | 4       | N |
| N       | N       | unknown | 2.3     | N |
| unknown | unknown | unknown | 8       | N |
| N       | N       | unknown | 1       | N |
| unknown | unknown | unknown | unknown | Y |
| N       | N       | unknown | 1       | N |
| N       | N       | unknown | 10      | N |
| unknown | unknown | N       | 23      | Y |
| N       | N       | unknown | unknown | Y |
| N       | N       | unknown | unknown | Y |
| N       | unknown | N       | 5       | N |
| N       | N       | N       | 15      | N |
| unknown | unknown | N       | 14      | Y |
| N       | N       | unknown | 3       | N |
| unknown | unknown | unknown | 7       | Y |
| Y       | N       | unknown | 5       | N |
| N       | N       | unknown | 3.3     | Y |
| N       | N       | N       | 8       | N |
| N       | N       | unknown | 10      | N |
| N       | N       | unknown | unknown | Y |
| N       | N       | N       | 10      | Y |
| N       | N       | unknown | unknown | Y |
| N       | N       | N       | 8       | N |
| N       | Y       | N       | 5       | Y |
| N       | Y       | N       | 5       | N |
| N       | N       | N       | 3       | N |
| N       | N       | unknown | 1       | Y |
| Y       | N       | unknown | 3       | N |
| N       | N       | N       | 5       | Y |
| N       | N       | N       | 10      | N |
| N       | N       | unknown | unknown | Y |
| N       | Y       | unknown | 5       | N |
| N       | N       | unknown | unknown | N |
| N       | N       | unknown | 10      | N |
| unknown | unknown | unknown | 18      | Y |
| N       | N       | unknown | 8       | N |
| N       | N       | unknown | unknown | N |
| N       | N       | unknown | 10      | Y |
| N       | N       | N       | 20      | N |
| Y       | N       | unknown | 6       | Y |
| N       | N       | unknown | 10      | Y |
| unknown | unknown | unknown | 5       | Y |
| Y       | N       | N       | 1       | N |
| unknown | unknown | unknown | unknown | Y |
| unknown | unknown | unknown | unknown | N |
| N       | N       | unknown | 2       | Y |
| N       | N       | unknown | 16      | Y |
| Y       | Y       | N       | 0.3     | Y |
| N       | N       | N       | unknown | Y |
| N       | N       | unknown | unknown | Y |
| N       | N       | unknown | 20      | N |
| N       | N       | unknown | 6       | N |
| Y       | Y       | unknown | 20      | N |
| N       | N       | unknown | 0.7     | N |

|         |         |         |         |   |
|---------|---------|---------|---------|---|
| N       | N       | unknown | 10      | N |
| N       | N       | unknown | 11      | N |
| N       | Y       | unknown | 5       | N |
| Y       | N       | N       | 6       | Y |
| N       | N       | unknown | 6       | N |
| N       | N       | unknown | unknown | Y |
| N       | N       | unknown | unknown | Y |
| Y       | N       | unknown | 3       | N |
| Y       | Y       | N       | 12      | N |
| unknown | unknown | unknown | 8       | Y |
| N       | N       | unknown | 1       | Y |
| N       | N       | unknown | unknown | N |
| N       | N       | unknown | 2       | N |
| N       | N       | unknown | 5       | N |
| N       | N       | unknown | 8       | N |
| N       | N       | unknown | 9       | N |
| N       | N       | N       | 9       | N |
| unknown | unknown | N       | 10      | Y |
| N       | N       | N       | 5       | N |
| N       | Y       | unknown | unknown | N |
| N       | N       | unknown | unknown | N |
| N       | N       | unknown | 11      | N |
| N       | N       | N       | 3       | N |
| N       | N       | N       | 10      | N |
| N       | N       | unknown | 5       | N |
| N       | Y       | N       | unknown | N |
| N       | N       | unknown | 4       | N |
| unknown | unknown | unknown | unknown | N |
| N       | Y       | N       | 3       | Y |
| N       | N       | unknown | 5       | Y |
| N       | N       | N       | 18      | Y |
| N       | N       | unknown | 0.8     | Y |
| unknown | unknown | unknown | 5       | Y |
| N       | N       | N       | 4       | Y |
| N       | N       | unknown | 20      | N |
| Y       | N       | N       | unknown | N |
| unknown | unknown | unknown | 6       | N |
| N       | N       | unknown | 1       | N |
| N       | Y       | unknown | 14      | Y |
| N       | N       | N       | 2       | N |
| N       | N       | N       | unknown | N |
| N       | N       | N       | 20      | N |
| N       | N       | unknown | 7       | N |
| unknown | unknown | unknown | 8       | Y |
| Y       | N       | N       | 10      | N |
| Y       | N       | unknown | unknown | N |
| Y       | Y       | unknown | 5       | N |
| N       | N       | N       | 10      | N |
| N       | N       | N       | 20      | N |
| N       | N       | N       | unknown | N |
| Y       | Y       | N       | 20      | N |
| N       | N       | unknown | 20      | N |

Glycated hemoglobin (hba1c) for 2-3

| months | albumin(CAR) | triglyceride (TG) | cholesterol (TC) |
|--------|--------------|-------------------|------------------|
| 7.9    | 41.51        | 15.15             | 5.06             |
| 7.3    | 31.83        | 3.06              | 3.42             |
| 7.5    | 28.57        | 1.71              | 3.69             |
| 7.7    | 38.7         | 0.88              | 2.74             |
|        | 42.95        | 1.67              | 3.84             |
|        | 37.28        | 1.85              | 3.43             |
| 4.9    | 39.67        | 3.97              | 3.18             |
| 7.6    | 34.52        | 1.45              | 3.94             |
| 6.5    | 35.88        | 1.36              | 4.00             |
| 8.6    | 38.47        | 2.67              | 4.05             |
| 7.9    | 38.14        | 1.33              | 4.17             |
| 7.1    | 43.01        | 1.44              | 4.38             |
| 9.2    | 41.81        | 0.78              | 3.22             |
| 6.7    | 37.55        | 1.27              | 3.11             |
| 7.3    | 34.89        | 1.3月              | 3.67             |
| 8.1    | 31.89        | 1.27              | 2.8              |
| 6.5    | 33.85        | 0.83              | 2.68             |
| 6.8    | 38.91        | 0.92              | 3.24             |
| 5.8    | 45.03        | 10.98             | 5.15             |
| 7.3    | 33.05        | 1.02              | 2.9              |
| 7.8    | 41           | 0.87              | 3.79             |
| 7.8    | 41           | 0.87              | 3.79             |
| 6.8    | 45.77        | 0.69              | 3.3              |
| 8.9    | 36.93        | 7.82              | 6.41             |
| 10.4   | 38           | 2.32              | 5.88             |
| 7.     | 34.56        | 1.57              | 2.26             |
| 6.9    | 41.6个人       | 1.11              | 2.11             |
| 5.3    | 34.79        | 0.9               | 3.68             |
|        | 37.09        | 2.05              | 3.48             |
|        | 39           | 1.26              | 4                |
| 11.2   | 48.83        | 2.08              | 5.37             |
| 6.8    | 41.99        | 1.33              | 4.18             |
| 7.2    | 40.51        | 1.74              | 4.21             |
| 6.4    | 31.49        | 0.66              | 3.54             |
| 6.5    | 41.47        | 3.15              | 4.36             |
|        | 40.12        | 1.56              | 2.85             |
| 7.     | 41.38        | 1.73              | 3.4              |
| 9.5    | 26.26        | 0.79              | 2.35             |
| 6.1    | 36.85        | 1.42              | 3.36             |
| 6.5    | 29.84        | 1.55              | 4.52             |
| 11.8   | 35.85        | 18.52             | 8.31             |
| 8.5    | 39.19        | 0.78              | 3.68             |
| 6.2    | 39.64        | 1.56              | 5.36             |
| 6.5    | 39.93        | 1.05              | 3.13             |
| 7.6    | 39.12        | 1.17              | 2.96             |
| 8.6    | 32.87        | 1.16              | 4.49             |
| 6.0    | 28.71        | 0.69              | 2.56             |
|        | 40.79        | 1.58              | 3.51             |
| 6.1    | 37.6         | 1.22              | 2.84             |
| 7.2    | 35.03        | 1.56              | 2.58             |
| 8.8    | 33.27        | 2.38              | 3.29             |

|      |       |      |      |
|------|-------|------|------|
| 7.7  | 43.76 | 0.64 | 4.67 |
| 6.5  | 35.19 | 1.33 | 3.62 |
| 7.4  | 44.5  | 4.95 | 4.75 |
| 9.4  | 35.41 | 1.43 | 3.05 |
| 6.7  |       |      |      |
| 7.4  |       |      |      |
| 6.8  | 45.67 | 0.69 | 2.96 |
| 8.0  | 36.96 |      |      |
| 9.7  |       |      |      |
| 15   | 34.69 | 1.13 | 2.54 |
| 5.4  | 34.01 | 1.23 | 3.22 |
| 8.2  | 36.04 | 0.84 | 2.2  |
| 7.4  | 40.74 | 0.57 | 4.31 |
| 8.2  |       |      |      |
|      | 33.81 | 1.12 | 4.74 |
| 6.0  | 38.14 | 0.94 | 2.41 |
| 15.7 | 34.66 | 2.8  | 5.02 |
| 12.9 | 33.84 | 0.69 | 3.4  |
| 7.0  | 38.59 | 1.35 | 5.54 |
| 4.7  | 40.58 | 1.38 | 3.04 |
| 9.5  | 40.46 | 2.98 | 3.49 |
| 7.5  | 35.84 | 1.17 | 4.61 |
| 5.8  | 29.08 |      |      |
| 6.9  | 37.17 | 1.18 | 4.34 |
| 5.6  | 39.68 | 0.56 | 3.37 |
| 7.9  | 39.69 | 1.91 | 5.3  |
| 7.3  | 40.54 | 2.96 | 5.49 |
| 6.6  | 37.51 | 2.48 | 3.61 |
| 6.9  | 39.59 | 0.59 | 3.56 |
| 6.1  | 34.78 | 0.72 | 1.83 |
| 6.1  | 37.29 | 4.51 | 5.41 |
| 8.6  | 39.1  | 4.13 | 4.51 |
| 7.7  | 40.56 | 1.01 | 3.71 |
| 6.9  | 40.59 | 1.29 | 2.7  |
| 9.7  | 39.38 | 2.41 | 5.67 |
| 6.0  | 36.48 | 1.63 | 4.16 |
|      | 37.43 | 2.14 | 3.15 |
| 6.4  | 36.09 | 2.1  | 3.77 |
| 7.9  | 37.48 | 1.65 | 3.83 |
| 6.8  | 42.66 | 0.85 | 2.75 |
| 6.2  | 37.24 | 0.95 | 3.68 |
| 5.7  | 37.83 | 1.28 | 4.13 |
| 7.5  | 45.87 | 7.02 | 6.31 |
| 7.1  | 34.5  | 1.53 | 3.07 |
| 7.5  | 40.22 | 1.85 | 4.84 |
| 6.0  |       | 4.92 | 4.16 |
| 11.8 | 30.35 | 2.55 | 5.71 |
| 7.9  | 54.4  | 1.02 | 3.23 |
| 7.4  | 43.5  | 1.32 | 4.43 |
| 7.1  | 42.01 | 1.71 | 3    |
|      |       | 1.79 | 3.87 |
| 7.6  | 33.47 | 1.17 | 4.39 |
| 7.5  | 39.26 | 1.51 | 4.69 |
| 6.8  | 35.28 | 1.27 | 3.44 |
| 5.8  | 38.24 | 1.03 | 2.55 |

|      |       |      |      |
|------|-------|------|------|
| 6.1  | 23.75 | 1.4  | 4.61 |
| 6.3  |       | 1.42 | 5.91 |
| 8.0  | 59.59 | 0.74 | 2.02 |
| 6.7  | 29.86 | 1.45 | 3.72 |
| 6.8  | 39.2  | 1.86 | 5.06 |
| 7.5  | 42.15 | 6.33 | 3.97 |
| 6.4  | 40.41 | 1.66 | 3.19 |
| 6.2  | 40.43 | 1.81 | 3.4  |
| 7.5  | 37.91 | 1.14 | 3    |
| 6.6  |       |      |      |
| 5.6  | 42.51 | 3.67 | 3.71 |
| 6.6  | 35.33 | 0.95 | 3.37 |
| 6.5  | 42.63 | 1.52 | 4.6  |
|      | 40.29 | 1.12 | 3.75 |
| 7.8  | 37.2  |      |      |
| 6.1  | 40.69 | 0.83 | 5.56 |
| 6.0  | 36.94 | 1.43 | 3.85 |
| 7.6  |       | 0.93 | 3.29 |
| 5.9  | 49.51 | 1.79 | 4.02 |
| 6.9  | 42.8  | 1.6  | 4.56 |
| 6.3  | 30.8  | 0.92 | 2.73 |
| 5.7  | 38.79 | 0.92 | 2.66 |
| 7.7  | 38.39 | 2.47 | 3.31 |
| 7.4  | 36.43 | 1.1  | 4.61 |
| 6.2  | 38.24 | 7.61 | 4.63 |
| 5.4  | 35.88 | 0.98 | 3.15 |
| 6.3  | 49.41 | 4.64 | 5.83 |
|      | 44.23 | 1.59 | 5.14 |
|      | 40.98 | 2.88 | 3.31 |
| 6.1  | 37.78 | 1.03 | 3.95 |
|      | 36.3  | 1.14 | 3.94 |
| 5.9  | 36.59 | 2.51 | 5.29 |
| 7.1  | 42.23 | 1.39 | 3.66 |
| 5.9  | 34.45 | 1.75 | 5.27 |
| 6.7  | 37.91 | 2.06 | 4.59 |
| 6.1  | 41.4  | 1.59 | 4.82 |
| 7.9  | 39.4  | 1.11 | 4.17 |
| 7.5  | 44    | 0.82 | 4.92 |
| 10.8 | 39.13 | 1.5  | 4.42 |
| 6.0  | 38.21 | 1.64 | 2.3  |
|      | 40.49 | 0.65 | 2.35 |
| 6.7  | 39.7  | 1.21 | 4.55 |
| 8    | 34.29 | 1.99 | 3.31 |
|      | 27.51 | 1.4  | 3.06 |
| 10.1 | 37.74 | 2.33 | 4.52 |
| 7.5  | 38.41 | 0.78 | 2.65 |
| 6.8  | 36.86 | 1.23 | 3.55 |
| 6.0  | 36.39 | 1.04 | 3.23 |
| 7.7  | 36.2  | 1.85 | 3.83 |
| 6.1  | 37.28 | 2.23 | 5.36 |
| 7.3  | 42.18 | 2.55 | 4.59 |
| 5.4  | 55.3  | 1.31 | 3.22 |
| 6.3  | 32.38 | 1.57 | 6.17 |
| 7.1  | 41.82 | 2.81 | 4.45 |
| 6.5  | 43.39 | 2.49 | 2.56 |

|      |       |      |      |
|------|-------|------|------|
| 7.7  | 34.03 | 2.07 | 4.88 |
| 6.7  | 43.19 | 2.75 | 3.27 |
|      | 44.05 | 1.51 | 3.27 |
| 7.5  | 37.95 | 1    | 4.99 |
| 9.1  | 36.16 | 1.34 | 3.12 |
| 7.1  | 39.33 | 1    | 3.67 |
|      | 39.69 | 1.38 | 3.75 |
|      | 37.94 | 1.17 | 4.78 |
| 8.6  | 36.15 | 1.54 | 6.42 |
| 6.4  | 41.15 | 1.08 | 3.07 |
| 6.4  | 45.86 | 3.43 | 3.5  |
| 7.6  | 39.65 | 1.57 | 4.55 |
| 7.4  | 43.82 | 1.56 | 4.39 |
| 10.4 | 31.9  | 1.59 | 3.76 |
| 6.9  | 34.3  | 0.79 | 4.43 |
| 10.3 |       |      |      |
| 7.1  | 38.94 | 1.85 | 3.92 |
| 8.7  | 48.2  | 0.89 | 3.36 |
| 6.6  | 37.65 | 2.41 | 4.61 |
| 8.5  | 40.19 | 3.93 | 4.34 |
| 6.5  | 38.24 | 1.16 | 4.14 |
| 7.8  | 44.92 | 0.61 | 2.69 |
| 6.9  | 47.04 | 2.23 | 5.17 |
| 7.4  | 34.06 |      |      |
| 7.3  | 38    | 1.3  | 3.86 |
| 5.9  | 40.73 | 2.18 | 4.65 |
| 7.5  | 41.58 | 3.36 | 6.16 |
| 5.4  | 40    | 1.17 | 4.18 |
| 7.2  | 37.69 | 2.94 | 5.12 |
| 9.6  | 29.31 | 1.1  | 2.81 |
| 7.3  | 37    | 2.91 | 5.49 |
| 6.0  | 45.33 | 0.83 | 2.69 |
| 6.5  | 40.46 | 1.03 | 3.67 |
| 7.4  |       |      |      |
| 8.1  | 35.49 | 0.71 | 2.52 |
| 6.2  | 37.02 | 1.22 | 4.07 |
| 9.2  | 33.23 | 1.54 | 3.75 |
| 6.0  | 35    | 1.62 | 3.27 |
| 9.5  | 38.49 |      |      |
| 6.5  | 31.24 | 1.08 | 2.65 |
| 7.7  | 38.79 | 2.33 | 3.66 |
|      | 39.24 | 1.52 | 4.14 |
| 7.3  | 38.61 | 0.74 | 3.44 |
| 8    | 34.9  | 1.57 | 5    |
| 13.1 | 37.62 | 1.72 | 2.61 |
| 8.4  | 41.98 | 1.56 | 4.5  |
| 6.7  | 41.9  | 0.88 | 2.67 |
| 9.7  | 37.67 | 0.93 | 2.68 |
| 9.6  | 34.62 | 0.79 | 3.16 |
| 7    | 32.96 | 1.13 | 3.6  |
| 6.9  | 39.24 | 0.95 | 3.87 |
|      | 38.75 | 0.69 | 2.76 |



| High density lipoprotein cholesterol<br>(HDL-C) | Low density lipoprotein cholesterol<br>(LDL-C) | homocysteine(HCY) | Urea nitrogen<br>level |
|-------------------------------------------------|------------------------------------------------|-------------------|------------------------|
| 0.91                                            | 1.33                                           | 11.71             | 3.99                   |
| 0.75                                            | 1.3                                            | 17.3              | 20.48                  |
| 0.72                                            | 2.26                                           | 19.21             | 5.52                   |
| 0.76                                            | 164                                            | 9.44              | 4.98                   |
| 1.06                                            | 1.66                                           | 14.97             | 5.75                   |
| 0.72                                            | 1.78                                           | 20.91             | 4.51                   |
| 0.67                                            | 0.67                                           | 39.4              | 23.83                  |
| 1.13                                            | 2.02                                           | 19.11             | 2.63                   |
| 1.09                                            | 2.19                                           | 9.03              | 6.22                   |
| 0.76                                            | 2.59                                           | 11.84             | 5.63                   |
| 1.07                                            | 2.44                                           | 18.7              | 7.89                   |
| 0.93                                            | 2.92                                           | 15.57             | 4.67                   |
| 1.01                                            | 1.63                                           | 9.48              | 6.5                    |
| 0.82                                            | 1.75                                           | 12.99             | 7.2                    |
| 0.96                                            | 1.92                                           | 11.52             | 5.6                    |
| 0.82                                            | 1.2                                            | 22.32             | 3.99                   |
| 0.65                                            | 1.34                                           | 21.13             | 6.8                    |
| 0.98                                            | 1.64                                           | 15.86             | 4.09                   |
| 1.02                                            | 2.18                                           | 19.26             | 6.07                   |
| 0.69                                            | 1.34                                           | 11.76             | 3.5                    |
| 1.15                                            | 1.89                                           | 11.09             | 10.06                  |
| 1.15                                            | 1.86                                           | 11.9              | 10.6                   |
| 1.42                                            | 1.43                                           | 12.99             | 8.28                   |
| 1.2                                             | 2.32                                           | 17.72             | 8.66                   |
| 1.17                                            | 3.94                                           | 5.85              | 3.74                   |
| 0.58                                            | 0.8元                                           | 12.67             | 8.4                    |
| 0.75                                            | 0.68                                           | 11.64             | 5.8个人                  |
| 0.94                                            | 2.01                                           | 13.31             | 15.8                   |
| 0.91                                            | 1.23                                           | 12.98             | 8.76                   |
| 0.88                                            | 2.45                                           | 17.65             |                        |
| 1.44                                            | 2.91                                           | 7.96              | 5.42                   |
| 1.09                                            | 2.43                                           | 19.41             | 7.98                   |
| 1.15                                            | 2.22                                           | 8.29              | 3.17                   |
| 1.29                                            | 1.77                                           | 5.94              | 4.11                   |
| 0.83                                            | 2.56                                           | 10.76             | 4.15                   |
| 0.81                                            | 1.32                                           | 17.14             | 7.99                   |
| 0.95                                            | 1.6个人                                          | 12.9              | 7.3                    |
| 0.84                                            | 0.85                                           | 49.78             | 8.98                   |
| 0.91                                            | 1.46                                           | 13.06             | 5.29                   |
| 1.04                                            | 1.95                                           | 32.9              | 17                     |
| 1.25                                            | 2.94                                           | 8                 | 3.46                   |
| 0.25                                            | 2.26                                           | 10.36             | 5.82                   |
| 1.33                                            | 3.44                                           | 12.37             | 4.29                   |
| 0.87                                            | 1.74                                           | 10.8              | 6.3                    |
| 0.73                                            | 1.46                                           | 12.17             | 5.48                   |
| 1.16                                            | 1.75                                           | 10.92             | 5.84                   |
| 1.06                                            | 0.76                                           | 12.04             | 8.78                   |
| 1.28                                            | 1.18                                           | 12.22             | 4.5                    |
| 0.71                                            | 1.65                                           | 9.8               |                        |
| 0.54                                            | 1.50                                           | 16.8              | 8.42                   |
| 0.73                                            | 0.82                                           | 9.76              | 6.51                   |

|      |      |       |       |
|------|------|-------|-------|
| 1.37 | 2.82 | 9.13  | 5.74  |
| 0.83 | 1.99 | 17.9  | 4.65  |
| 1.1  | 2.67 |       | 8.12  |
| 0.72 | 1.81 | 7.07  | 5.77  |
|      |      |       | 4.68  |
| 0.8  | 1.83 | 14.28 | 3.46  |
|      |      |       | 5.79  |
| 0.75 | 1.44 | 10.69 | 5.64  |
| 0.92 | 1.48 | 32.94 | 15.11 |
| 0.8  | 0.83 | 9.89  | 5.67  |
| 1.36 | 2.46 | 10.76 | 6.94  |
|      |      |       | 5.38  |
| 0.94 | 3.51 | 12.23 | 5.51  |
| 0.95 | 0.74 | 11.78 | 3.85  |
| 0.94 | 3.46 | 6.94  | 2.48  |
| 0.89 | 2.13 | 16.34 | 8.22  |
| 1.24 | 4.18 | 11.88 | 5.54  |
| 0.76 | 1.73 | 18.23 | 8.21  |
| 0.84 | 2.33 | 11.33 | 7.01  |
| 1.29 | 3.07 | 10.01 | 5.9   |
|      |      |       | 9.36  |
| 1.22 | 2.69 | 8.4   | 6.13  |
| 1.39 | 1.41 | 17.87 | 6.51  |
| 1.01 | 3.1  | 13.01 | 3.58  |
| 0.97 | 4.32 | 18.27 | 3.1   |
| 0.87 | 1.51 | 10.79 | 5.71  |
| 0.92 | 2.27 | 10.72 | 5.78  |
| 0.66 | 0.75 | 8.4   | 5.97  |
| 1.05 | 3.3  | 11.19 | 6.64  |
| 0.9  | 2.72 | 13.98 | 6.26  |
| 0.89 | 2.11 | 11.97 | 6.97  |
| 0.86 | 1.28 | 14.85 | 6.4   |
| 1.05 | 3.88 | 17.49 | 6.06  |
| 1    | 2.56 | 14.29 | 9.31  |
| 0.67 | 2.02 | 16.46 | 6.92  |
| 0.8  | 2.35 | 9.55  | 7.45  |
| 0.99 | 2.66 | 14.16 | 6.17  |
| 0.95 | 1.46 | 12.72 | 7.31  |
| 1.18 | 1.79 | 13.39 | 6.39  |
| 0.84 | 2.94 | 14.73 | 8.07  |
| 1.22 | 2.07 | 12.9  | 4.59  |
| 0.78 | 1.73 | 23.9  | 8.37  |
| 1.04 | 3.56 | 10.64 | 4.93  |
| 0.93 | 2.33 | 21.24 | 4.32  |
| 0.95 | 3.63 | 19.72 | 6.38  |
| 0.74 | 1.8  | 9.36  | 4.04  |
| 0.72 | 3.21 | 20.28 | 6.72  |
| 0.98 | 1.48 | 18.29 | 8.8   |
| 0.71 | 2.52 | 11.49 | 4.91  |
| 1.17 | 2.29 | 14.4  | 7.92  |
| 1.04 | 3.07 | 15.92 | 5.39  |
| 0.79 | 2.05 | 12.28 | 6.41  |
| 0.73 | 1.24 | 17.12 | 3.54  |

|      |      |       |       |
|------|------|-------|-------|
| 1.76 | 1.78 | 20.54 | 15.85 |
| 1.15 | 4.6  | 8.88  | 5.4   |
| 0.82 | 0.88 | 9.24  | 5.49  |
| 0.86 | 2.05 | 10.45 | 2.76  |
| 1.13 | 3.25 | 13.29 | 6.63  |
| 0.75 | 2.58 | 17.71 | 3.89  |
| 1.07 | 1.28 | 17.17 | 7.48  |
| 0.81 | 1.82 | 21.52 | 7.36  |
| 0.76 | 1.77 | 13.03 | 4.93  |
| 0.82 | 2.49 | 14.44 | 5.24  |
| 0.94 | 1.72 | 8.34  | 3.25  |
| 1.02 | 2.71 | 18.24 | 12.66 |
| 1.01 | 2.1  | 16.19 | 6.19  |
|      |      |       | 4.97  |
| 1.09 | 3.69 | 10.24 | 8.97  |
| 0.87 | 0.97 | 13.51 | 5.21  |
| 0.8  | 2.28 | 11.72 | 4.83  |
| 1.12 | 1.92 | 21.7  | 8.19  |
| 1.05 | 2.95 | 16.35 | 7.62  |
| 0.92 | 1.12 | 25.67 | 5.84  |
| 0.76 | 1.5  | 14.4  | 7.62  |
| 0.81 | 1.53 | 20.34 | 9.95  |
| 1.09 | 3.04 | 26.49 | 18.18 |
| 0.98 | 2.65 | 16.42 | 4.71  |
| 1.18 | 1.33 | 16.73 | 3.6   |
| 1.27 | 3.08 | 11.2  | 4.24  |
| 1.18 | 3.06 | 9.09  | 3.87  |
| 0.76 | 1.57 | 9.72  | 4.98  |
| 0.68 | 2.82 | 14.83 | 6.94  |
| 1.09 | 2.16 | 47.29 | 3.67  |
| 1.16 | 2.56 | 10.93 | 6.18  |
| 0.8  | 2    | 19.15 | 7.41  |
| 1.01 | 4.03 | 11.76 | 5.37  |
| 1.04 | 2.68 | 20.89 | 10.8  |
| 0.99 | 3.01 | 17.99 | 3.98  |
| 1.1  | 2.64 | 8.46  | 8.34  |
| 1.33 | 3.28 | 17.87 | 6.41  |
| 1.19 | 2.11 | 49.97 | 3.83  |
| 0.76 | 0.86 | 34.53 | 9.84  |
| 1.08 | 0.59 | 9.74  | 6.7   |
| 1.16 | 2.59 | 13.74 | 6.56  |
| 0.76 | 1.78 | 21.72 | 7.67  |
| 0.69 | 1.64 | 36.71 | 23.33 |
| 0.86 | 2.96 | 12.47 | 6.46  |
| 0.8  | 1.23 | 10.39 | 6.57  |
| 0.88 | 1.95 | 12.69 | 6.01  |
| 0.92 | 1.82 | 14.01 | 6.77  |
| 0.92 | 1.57 | 18.41 | 7.35  |
| 1.08 | 3.35 | 8.03  | 5.15  |
| 1.01 | 2.75 | 11.09 | 5.61  |
| 1.32 | 1.37 | 8.75  | 3.55  |
| 0.91 | 4.49 | 18.48 | 5.77  |
| 0.95 | 2.81 | 17.19 | 4.13  |
|      |      |       | 10    |
| 0.72 | 0.9  | 16.9  | 8.34  |

|      |      |       |       |
|------|------|-------|-------|
| 0.92 | 3.37 | 16.23 | 6.85  |
| 0.78 | 1.46 | 16.19 | 9.38  |
| 0.93 | 1.85 | 19.95 | 6.79  |
| 1.29 | 2.59 | 9.63  | 7.7   |
| 0.85 | 1.49 | 13.34 | 5.58  |
| 1.21 | 1.66 | 15.85 | 8.77  |
| 1.13 | 1.53 | 12.24 | 5.13  |
| 1.03 | 2.78 | 13.79 | 7.46  |
| 1.55 | 3.47 | 10.29 | 4.33  |
| 0.93 | 1.47 | 16.91 | 6.78  |
| 0.78 | 1.6  | 16.27 | 4.53  |
| 1.03 | 2.79 | 12.28 | 4.36  |
| 0.83 | 2.64 | 18.35 | 5.57  |
| 0.82 | 2.37 | 8.11  | 4.55  |
| 1.08 | 2.58 | 8.98  | 5.76  |
|      |      |       | 5.41  |
| 1.14 | 2.22 | 8.79  | 6.03  |
| 1.25 | 1.47 | 8.14  | 4.4   |
| 0.84 | 2.97 | 16.95 | 3.39  |
| 0.85 | 2.96 | 12.41 | 4.54  |
| 1.06 | 2.28 | 17.95 | 9.62  |
| 0.87 | 1.12 | 17.06 | 5.86  |
| 1.34 | 2.67 | 12.56 | 6.52  |
|      |      |       | 2.12  |
| 0.86 | 2.49 | 11.48 | 6.65  |
| 1.33 | 2.52 | 14.52 | 5.96  |
| 1.24 | 4.24 | 8.13  | 5.29  |
| 1.37 | 0.94 | 21.04 | 6.87  |
| 1.02 | 2.51 | 16.96 | 6.44  |
| 0.69 | 1.03 | 15.13 | 6.12  |
| 1.11 | 2.24 | 23.62 | 17.26 |
| 0.86 | 1.12 | 14.5  | 6.27  |
| 0.9  | 1.73 | 14.5  | 8.46  |
|      |      |       | 4.87  |
| 1.15 | 0.63 | 18.3  | 11.12 |
| 1.06 | 2.12 | 17.96 | 6.29  |
| 0.78 | 1.99 | 13.87 | 8.22  |
| 0.93 | 1.5  | 23.04 | 9.7   |
|      |      |       | 5.39  |
| 0.76 | 1.13 | 12.97 | 8.16  |
| 1.3  | 1.35 | 15.64 | 2.98  |
| 0.93 | 2.55 | 18.62 | 7.96  |
| 0.76 | 2    | 18.46 | 7.53  |
| 1    | 3.27 | 10.7  | 9.24  |
| 0.68 | 1.09 | 12.8  | 7.53  |
| 0.8  | 3.02 | 13.25 | 3.73  |
| 0.98 | 1.02 | 16.88 | 5.48  |
| 1.01 | 1.14 | 10.37 | 4.59  |
| 0.84 | 1.7  | 11.82 | 3.28  |
| 0.81 | 1.82 | 11.67 | 5.33  |
| 1.29 | 1.73 | 12.11 | 8.57  |
| 0.85 | 1.06 | 23.69 | 17.65 |

| Serum uric acid level | acid creatinine | Lactate dehydrogenase | cystatin c | creatinine kinase | Cardiac creatine kinase type | Troponin I | myoglobin |
|-----------------------|-----------------|-----------------------|------------|-------------------|------------------------------|------------|-----------|
| 368.1                 | 65.33           | 131.61                | 1.6        | 96.8              | 9                            | 0.001      | 41.2      |
| 501                   | 777             | 293                   | 8.11       | 132               | 84                           | 6.1        | 260.3     |
| 396.1                 | 80.07           | 150                   | 2611       | 11                | 5                            | 0.025      | 47.3      |
| 238.8                 | 64.26           | 146.69                | 1.52       | 55.8              | 13                           | 0.001      | 38.6      |
| 266.8                 | 54.51           | 134.38                | 1.56       | 42                | 8                            | 0.001      | 26.5      |
| 774                   | 74              | 189.5                 | 1.26       | 111               | 17                           | 0.007      | 76.2      |
| 392.1                 | 1394.55         | 145.36                | 10.87      | 48.4              | 11                           | 0.023      | 256.5     |
| 234.6                 | 80.06           | 185.94                | 2.44       | 41.5              | 8                            | 0.038      | 34.3      |
| 208                   | 43              | 186                   | 1.01       | 70                | 7                            | 0.001      | 30.6      |
| 217.4                 | 53.72           | 201.03                | 1.64       | 45.8              | 5                            | 0.002      | 29.7      |
| 494                   | 108             | 198.9                 | 1.77       | 49                | 10                           | 0.017      | 60.3      |
| 382.9                 | 80.79           | 171.4                 | 1.87       | 98.9              | 13                           | 0.011      | 42.4      |
| 297                   | 63              | 160.85                |            | 101.              | 10                           | 0.007      | 90.9      |
| 352.1                 | 100.27          | 152                   | 2.12       | 75.3              | 17                           | 0.00月      | 57.6      |
| 285                   | 81              | 167.9                 | 1.57       | 69                | 7                            | 0.015      | 40.9      |
| 395                   | 81              | 281.6                 | 1.34       | 111               | 10                           | 1.42       | 63.8      |
| 232.1                 | 87.78           | 157.24                | 3.76       | 34.9              | 4                            | 0.006      | 54.5      |
| 400                   | 94              | 192.3                 | 1.29       | 140.7             | 10                           | 0.005      | 60.1      |
| 438.8                 | 71.23           | 210.46                | 1.69       | 137.8             | 42                           | 0.001      | 27.6      |
| 426                   | 78              | 180                   | 1.34       | 71                | 4                            | 0.107      | 40.9      |
| 292                   | 72              | 155.1                 | 0.95       | 132               | 10                           | 0.003      | 37.9      |
| 292                   | 72              | 155.1                 | 0.95       | 132               | 10                           | 0.003      | 37.9      |
| 376.8                 | 97.77           | 199.06                | 2.08       | 161.2             | 5                            | 0.003      | 165.5     |
| 39个人                  | 96              | 138.4                 | 1.57       | 422.7             | 9                            | 0.016      | 154.3     |
| 295                   | 36              | 582.85                | 0.65       | 1602.2            | 127                          | 80         | 1269.7    |
| 302                   | 67              | 174.7                 | 1.42       | 52.9              | 12                           | 0.004      | 36.3      |
| 348.3                 | 88.13           | 148.15                | 1.02       | 112.9             | 25                           | 0.002      | 28        |
| 581.7                 | 387.48          | 202.72                | 5.79       | 115.3             | 12                           | 0.639      | 388.2     |
| 174.9                 | 109.11          | 244.78                | 3.06       | 171.3             | 15                           | 0.003      | 140.5     |
|                       |                 | 168.6                 |            | 62.8              | 7                            | 0.073      | 44.3      |
| 349.7                 | 36.65           | 190.25                | 0.99       | 209.6             | 17                           | 0.001      | 28.2      |
| 279                   | 66              | 163.8                 | 0.79       | 32.2              | 10                           | 0.005      | 21.3      |
| 288                   | 61              | 195.4                 | 1.29       | 55.3              | 8                            | 0.004      | 31.9      |
| 210.3                 | 40.47           | 228.89                | 1.7        | 56.9              | 21                           | 0.031      | 30.3      |
| 409.6                 | 36.99           | 181.33                | 1.64       | 61.7              | 5                            | 0.002      | 34.5      |
| 463.2                 | 83.94           | 164.47                | 1.79       | 73.9              | 14                           | 0.002      | 49.9      |
| 428                   | 76              | 129.6                 | 1.46       | 89.6              | 7                            | 0.007      | 70.6      |
| 378                   | 190             | 1187.3                | 2.68       | 3310.7            | 291                          | 80         | 2133.5    |
| 355                   | 75.3            | 176.8月                | 1.77       | 69.5              | 14                           | 0.001      | 19.8      |
| 419                   | 504             | 257.6                 | 4.45       | 563.7             | 19                           | 428.1      | 428.1     |
| 383                   | 58              | 179.4                 | 0.64       | 112               | 10                           | 0.003      | 43.5      |
| 300.3                 | 60.92           | 192.82                | 1.78       | 69                | 14                           | 0.001      | 24.9      |
| 268                   | 47              | 449.5                 | 0.89       | 862.8             | 49                           | 15.5       | 96.9      |
| 360                   | 80              | 184.3                 | 0.99       | 57.9              | 9                            | 0.137      | 24        |
| 484.7                 | 96.88           | 204.97                | 1.95       | 166.4             | 17                           | 0.003      | 51.3      |
| 274                   | 65              | 243.8                 | 1.03       | 133.2             | 11                           | 0.015      | 70.2      |
| 344                   | 95              | 164.34                | 2.38       | 982.7             | 20                           | 1.52       | 922.2     |
| 327.1                 | 88.03           | 194.36                | 1.89       | 80                | 9                            | 0.002      | 38.9      |
|                       |                 | 175.7                 |            | 137.7             | 14                           | 0.006      | 43.4      |
| 504.9                 | 92.17           | 328.02                | 3.34       | 148.8             | 40                           | 5.62       | 191.6     |
| 276                   | 62              | 275.3                 | 1          | 22.1              | 3                            | 0.107      | 24.7      |

|       |        |        |      |        |     |       |       |
|-------|--------|--------|------|--------|-----|-------|-------|
| 264   | 44     | 216.9  | 0.79 | 89.9   | 8   | 0.002 | 43.4  |
| 446   | 74     | 293.2  | 2.48 | 29.5   | 11  | 0.035 | 50.6  |
| 382.9 | 118.75 | 201.33 | 2.24 | 53     | 8   | 0.003 | 40.5  |
| 259   | 46     | 166.2  | 0.86 | 57.7   | 23  | 0.024 | 9.9   |
|       |        | 142.1  |      | 36.3   | 12  | 0.008 | 45.6  |
| 287   | 59     | 167.55 | 1.09 | 74.5   | 11  | 0.002 | 39.5  |
| 428   | 59     | 176.1  |      | 80.7   | 14  | 0.772 | 99.5  |
| 259   | 46     |        | 0.89 |        |     |       |       |
|       |        | 210.1  |      | 35     | 13  | 0.077 | 25.1  |
| 300.9 | 70.17  | 180.1  | 0.81 | 45.5   | 8   | 0.003 | 18.9  |
| 566.2 | 399.36 | 394.9  | 5.87 | 284    | 27  | 18.4  | 458   |
| 285   | 65     | 187.2  | 1.03 | 139.4  | 13  | 0.009 | 57.8  |
| 232   | 53.77  | 225.75 | 0.99 | 94.9   | 24  | 0.044 | 23.9  |
| 287   | 70     | 252.3  | 1.2  | 40.5   | 16  | 0.002 | 28.4  |
| 277   | 55     | 314.9  | 0.95 | 315.5  | 17  | 5.99  | 38.4  |
| 290   | 51     | 200.6  | 0.83 | 119.5  | 13  | 0.003 | 56.8  |
| 292   | 49     | 147.86 | 0.99 | 73     | 16  | 0.019 | 15.8  |
| 370   | 78     | 589.3  | 1.24 | 1661.9 | 57  | 50.8  | 394.9 |
| 299.2 | 90.16  | 161.71 | 1.03 | 43.1   | 12  | 0.001 | 19.2  |
| 487   | 99     | 231.5  | 1.53 | 100.8  | 11  | 0.012 | 57.1  |
| 491   | 117    | 169.75 | 2.01 | 100.5  | 12  | 0.083 | 62.4  |
| 175   | 45     | 470.3  | 1.01 | 134    | 107 | 1.27  | 41.8  |
| 335   | 122    | 165.6  | 2.42 | 110.1  | 6   | 0.017 | 222.6 |
| 362.9 | 71.79  | 197.82 | 0.96 | 92.4   | 15  | 0.001 | 19.3  |
| 256   | 64     | 229.8  | 1.08 | 142.2  | 18  | 0.005 | 56.4  |
| 291   | 60     | 209.7  | 0.81 | 93.4   | 11  | 1.24  | 22.5  |
| 398.9 | 76.17  | 191.64 | 1.1  | 99.2   | 10  | 1.48  | 17.5  |
| 317   | 59     | 177.1  | 1.01 | 100.5  | 9   | 0.004 | 48.1  |
| 258   | 52     | 126.74 | 0.83 | 70.3   | 12  | 0.004 | 18.8  |
| 403   | 59     | 176.1  | 1.02 | 90.2   | 11  | 0.005 | 32.4  |
| 425   | 44     | 188.7  | 0.8  | 123.8  | 11  | 0.005 | 43.3  |
| 297.6 | 53.54  | 181.87 | 1.54 | 49.5   | 15  | 0.007 | 25.8  |
| 274   | 74     |        | 1.75 |        |     |       |       |
| 363.3 | 78.46  | 235.18 | 1.37 | 83.3   | 18  | 0.014 | 32.8  |
| 417   | 92     | 186.2  | 1.57 | 53.5   | 12  | 0.114 | 85.9  |
| 341.2 | 63.47  | 223.07 | 1.63 | 80.1   | 31  | 0.106 | 27.2  |
| 258   | 95.85  | 217.76 | 2.42 | 84.9   | 9   | 0.59  | 52.8  |
| 344   | 83     | 207.7  | 0.92 | 78.9   | 5   | 0.031 | 19.9  |
| 170.7 | 69.59  | 200.12 | 1.55 | 106.9  | 13  | 0.003 | 51.1  |
| 415   | 62     | 212.3  | 0.97 | 85.7   | 9   | 0.008 | 37    |
| 306.4 | 86.32  | 179.82 | 2    | 183.7  | 13  | 0.003 | 111.9 |
| 323.8 | 73.22  | 173.46 | 0.98 | 83.7   | 15  | 0.011 | 34.2  |
| 413.8 | 65.2   | 190.64 | 0.85 | 191.6  | 17  | 0.004 | 24.4  |
| 564.3 | 110.2  | 192.85 | 2.23 | 52.9   | 18  | 0.009 | 28.5  |
| 461   | 50     | 312.2  | 0.94 | 359    | 18  | 5.65  | 38.6  |
| 339   | 45     | 445.4  | 1.01 | 98     | 14  | 5.4   | 31.5  |
| 403   | 121    |        | 2.03 |        |     | 0.53  |       |
| 265   | 60     | 185.4  | 0.89 | 82.6   | 11  | 0.004 | 34.6  |
| 390.9 | 84.53  | 174.52 | 1.63 | 34.8   | 10  | 0.001 | 43.8  |
| 414   | 66     | 217.7  | 2.08 | 53.6   | 18  | 0.007 | 22    |
| 317   | 51     | 202    | 0.99 | 134.5  | 12  | 0.003 | 56.6  |
| 304   | 69     | 260.9  | 1.25 | 84     | 9   | 0.033 | 62.8  |
| 293.6 | 39.58  | 177.79 | 0.92 | 104.1  | 39  | 0.007 | 20.5  |
| 420   | 55     | 190.9  | 0.85 | 276.7  | 13  | 0.005 | 170.9 |
| 339   | 92     | 149.39 | 1.36 | 43.6   | 5   | 0.009 | 22.6  |

|       |        |        |      |        |     |       |       |
|-------|--------|--------|------|--------|-----|-------|-------|
| 576.4 | 277.47 | 231.77 | 3.9  | 203.5  | 23  | 0.032 | 292.3 |
| 287   | 50     | 530.8  | 0.89 | 2846.1 | 238 | 60.3  | 737.6 |
| 218   | 88     | 196.7  | 1.01 | 164    | 18  | 0.723 | 157.6 |
| 39.98 | 226.5  | 403.83 | 0.98 | 158.1  | 13  | 16.8  | 37    |
| 236.9 | 57.48  | 323.33 | 1.08 | 92.4   | 72  | 0.982 | 40.7  |
| 366   | 73     | 166    | 1.11 | 160.5  | 10  | 0.05  | 84    |
| 482   | 135    | 170.6  | 1.37 | 91.9   | 9   | 0.005 | 85.7  |
| 584.3 | 134.83 | 234.7  | 1.5  | 133.5  | 11  | 0.004 | 27.8  |
| 250   | 59     | 204.32 | 0.76 | 40.1   | 12  | 0.346 | 30.3  |
| 395   | 62     | 189.7  | 1.05 | 71.5   | 9   | 0.004 | 24.1  |
| 296   | 62     | 202    | 0.93 | 105.8  | 10  | 0.015 | 27.1  |
| 494   | 160    | 189.1  | 2.3  | 296.3  | 12  | 0.002 | 247.9 |
| 225   | 63     | 155.9  | 1.16 | 65.7   | 7   | 0.082 | 44.5  |
| 319.9 | 56.58  | 137.98 | 1.2  | 61.1   | 12  | 0.003 | 29.9  |
| 405   | 85     | 1203   | 1.12 | 1387   | 63  | 64.6  | 84.8  |
| 528   | 87     | 140.4  | 1.18 | 75.7   | 15  | 0.015 | 40.2  |
| 235   | 44     | 611.1  | 0.81 | 623.1  | 37  | 50.4  | 107.9 |
| 492   | 127    | 177.3  | 1.42 | 69.8   | 8   | 0.004 | 58.5  |
| 413.9 | 85.71  | 175.39 | 1.43 | 47.2   | 11  | 0.001 | 35.3  |
| 358   | 120    | 305.3  | 1.74 | 402.9  | 21  | 17.4  | 319.7 |
| 437.1 | 81.15  | 174.48 | 1.7  | 211.9  | 25  | 0.014 | 71.5  |
| 396.2 | 87.4   | 148.66 | 1.73 | 80.4   | 13  | 0.007 | 48.9  |
| 333.1 | 676.8  | 216.44 | 6.96 | 65.4   | 16  | 0.093 | 264.8 |
| 441   | 59.44  | 183.15 | 1.08 | 63     | 19  | 0.004 | 20.3  |
| 275   | 50     | 185.6  | 0.97 | 81.6   | 16  | 0.005 | 54.3  |
| 274   | 38     | 198.9  | 0.82 | 57.7   | 11  | 0.004 | 28.2  |
| 256   | 39     | 221.4  | 0.62 | 52.3   | 6   | 0.005 | 18.3  |
| 295.8 | 72.27  | 159.07 | 0.92 | 58.2   | 22  | 0.006 | 25.9  |
| 546   | 81     | 189.7  | 1.38 | 94.4   | 15  | 0.012 | 66    |
| 399.9 | 55.99  | 128.09 | 0.88 | 37.5   | 10  | 0.003 | 19.3  |
| 405   | 75     | 198.1  | 1.36 | 94.9   | 13  | 0.024 | 68.8  |
| 581   | 101    | 172.63 | 1.18 | 198.7  | 13  | 0.011 | 124.7 |
| 384   | 95     | 518.3  | 1.22 | 518.2  | 34  | 14.3  | 62.1  |
| 656.7 | 148    | 272.78 | 2.47 | 71.8   | 20  | 0.708 | 71.3  |
| 363   | 77     | 151.6  | 1.13 | 36.3   | 8   | 0.068 | 34.9  |
| 465.4 | 134.34 | 163.62 | 1.86 | 320.3  | 17  | 0.025 | 116.3 |
| 335   | 74     | 201    | 1.19 | 96.5   | 11  | 0.008 | 51.4  |
| 293   | 96     | 519.4  | 1.57 | 356.7  | 26  | 29.1  | 162.8 |
| 409   | 122    | 160.4  | 1.62 | 21.5   | 8   | 0.014 | 57.2  |
| 269   | 74     | 245.7  | 0.92 | 138    | 15  | 0.005 | 49.1  |
| 297.4 | 59.14  | 200.94 | 0.68 | 620.3  | 17  | 0.01  | 108.2 |
| 453   | 91     | 271.6  | 1.42 | 35.5   | 8   | 0.011 | 24.3  |
| 403   | 1033   | 285    | 4.71 | 67.7   | 3   | 0.729 | 240.8 |
| 323   | 64     | 661.2  | 1.13 | 296.7  | 15  | 21.1  | 88.9  |
| 224.8 | 65.83  | 179.52 | 1.17 | 64.7   | 16  | 0.003 | 28.9  |
| 373   | 98     | 159    | 1.15 | 57.2   | 7   | 0.008 | 45.2  |
| 314   | 72.01  | 150.89 | 1.1  | 89.2   | 11  | 0.044 | 48.7  |
| 327   | 117    | 188    | 1.48 | 107.5  | 9   | 0.003 | 80.1  |
| 342.5 | 56.49  | 159.47 | 1.01 | 40.1   | 10  | 0.016 | 21.6  |
| 389   | 49     | 197.1  | 1.13 | 91.7   | 11  | 0.006 | 51.9  |
| 352.8 | 82.66  | 186.7  | 0.93 | 139.6  | 10  | 0.012 | 22.3  |
| 243   | 85     | 400.9  | 1.22 | 163.9  | 14  | 7.62  | 590   |
| 377.4 | 41.34  | 138.17 | 1.2  | 60.9   | 10  | 0.001 | 29.8  |
| 408   | 159    | 214.6  | 1.77 | 103.9  | 11  | 0.392 | 126.1 |
| 603   | 103    | 215.6  | 1.3  | 158.9  | 11  | 0.027 | 96.3  |

|       |        |        |      |       |    |       |       |
|-------|--------|--------|------|-------|----|-------|-------|
| 406.3 | 61.82  | 184.52 | 1.59 | 135.2 | 12 | 6.257 | 703.7 |
| 509.3 | 67.83  | 162.99 | 0.82 | 100   | 8  | 0.066 | 21.8  |
| 392   | 62     | 193    | 0.99 | 67.5  | 8  | 0.027 | 52.5  |
| 214.7 | 37.73  | 157.79 | 0.89 | 63.9  | 11 | 0.003 | 18.2  |
| 236   | 62     | 209.9  | 0.84 | 110.1 | 13 | 2.31  | 44.4  |
| 307.4 | 80.2   | 112.61 | 1.31 | 54.5  | 15 | 0.006 | 55.9  |
| 513   | 48     | 155.1  | 0.77 | 70.8  | 10 | 0.008 | 28.8  |
| 393.8 | 67.28  | 152.89 | 0.7  | 81.5  | 10 | 0.005 | 19.7  |
| 351   | 56     | 249.8  | 0.76 | 141.7 | 14 | 0.004 | 66.8  |
| 377.3 | 63.54  | 130.29 | 1.36 | 58.4  | 15 | 0.003 | 34.3  |
| 313   | 71     | 161.9  | 0.77 | 111.1 | 10 | 0.005 | 37.2  |
| 262.5 | 57.06  | 247.87 | 1.04 | 132.9 | 30 | 0.01  | 36.8  |
| 401   | 69     | 207.8  | 1.28 | 82.7  | 13 | 0.011 | 66    |
| 270.5 | 90.51  | 303.97 | 0.93 | 217.4 | 15 | 2.07  | 104.8 |
| 332   | 45     | 275.5  | 0.85 | 100   | 32 | 0.016 | 28.8  |
| 242   | 78     | 198.3  | 1.13 | 195.8 | 9  | 0.018 | 226.8 |
| 279   | 35     | 185.6  | 0.72 | 56.4  | 13 | 0.008 | 27.8  |
| 238.3 | 64.84  | 146.31 | 1.43 | 79.4  | 11 | 0.008 | 41.1  |
| 252.3 | 52.85  | 225.9  | 1.35 | 85.4  | 7  | 0.488 | 44    |
| 342   | 69     | 208.3  | 1.07 | 111.5 | 15 | 0.008 | 50.4  |
| 421.8 | 80.43  | 208.87 | 1.51 | 217.4 | 18 | 2.54  | 51.1  |
| 293   | 70     |        | 1.08 |       |    |       |       |
| 300   | 52     | 191.8  | 1.13 | 70.8  | 6  | 0.015 | 32.9  |
| 204   | 57     |        | 1.26 |       |    |       |       |
| 285.1 | 81.5   | 185.46 | 1.27 | 61.7  | 7  | 0.006 | 41.1  |
| 450   | 58     | 194.2  | 0.81 | 119.9 | 8  | 0.006 | 26.3  |
| 512   | 90.69  | 173.42 | 1.26 | 100.6 | 11 | 0.006 | 32.8  |
| 498.3 | 99.46  | 175.1  | 1.32 | 79.8  | 29 | 0.011 | 72.3  |
| 320.8 | 68.59  | 236.19 | 0.99 | 431.8 | 21 | 0.025 | 107.6 |
| 467   | 101    | 311.2  | 1.52 | 109.6 | 20 | 0.019 | 163   |
| 530.3 | 171.92 | 191.83 | 2.97 | 89    | 12 | 0.613 | 107.7 |
| 332.3 | 88.6   | 162.52 | 1.41 | 81.5  | 12 | 0.019 | 90.3  |
| 343   | 87.42  | 217.57 | 1.28 | 98.5  | 21 | 0.008 | 38.9  |
| 483   | 56     | 168.2  | 1    | 103.9 | 37 | 0.007 | 49.8  |
| 524   | 252    | 286.7  | 2.94 | 289.3 | 13 | 0.085 | 503.6 |
| 543.2 | 77.75  | 217.31 | 1.03 | 71.7  | 28 | 0.016 | 20.1  |
| 520   | 79     | 221.2  | 1.17 | 86.5  | 9  | 0.032 | 131.1 |
| 522.1 | 145.91 | 172.22 | 1.65 | 72.2  | 10 | 0.483 | 104   |
| 312   | 110    | 139.7  | 1.1  | 102.9 | 7  | 0.005 | 63.8  |
| 267.3 | 98.75  | 185.62 | 1.87 | 111.8 | 17 | 0.016 | 119   |
| 409   | 81     | 240.9  | 1.21 | 40.5  | 5  | 0.006 | 48    |
| 255   | 95     | 251.9  | 1.21 | 83.4  | 9  | 2.6   | 41.3  |
| 345   | 92     | 148.9  | 1.9  | 78.2  | 12 | 0.01  | 108.2 |
| 381.8 | 230.3  | 226.21 | 2.99 | 177.1 | 47 | 0.054 | 164.5 |
| 407   | 60.27  | 154.87 | 1.46 | 49.1  | 13 | 0.017 | 53.7  |
| 254   | 56     | 250.8  | 1.06 | 102.4 | 28 | 0.057 | 34.9  |
| 449   | 72     | 165.4  | 0.98 | 193.9 | 34 | 0.004 | 84.4  |
| 379   | 55     | 297.4  | 0.97 | 420.1 | 13 | 0.109 | 139.7 |
| 369   | 52     | 196    | 1.09 | 82.7  | 13 | 1.02  | 45.6  |
| 383.1 | 58.25  | 199.24 | 1.03 | 36.1  | 6  | 0.009 | 19.1  |
| 307.2 | 61.86  | 193.61 | 1.2  | 111.7 | 13 | 0.01  | 44.5  |
| 494.8 | 920.85 | 181.7  | 5.79 | 27.4  | 8  | 0.223 | 117.8 |



| CRP   | neutrophil | lymphocyte | Red blood cell<br>distribution width<br>standard deviation | Red blood cell<br>distribution width<br>coefficient of variation |
|-------|------------|------------|------------------------------------------------------------|------------------------------------------------------------------|
|       | 3.35       | 2.3        | 43.8                                                       | 13.8                                                             |
|       | 3.57       | 1.84       | 47.4                                                       | 16.4                                                             |
| 75.1  | 9.66       | 2.35       | 50.4                                                       | 16.3                                                             |
|       | 3.31       | 1.79       | 47.4                                                       | 13.8                                                             |
|       | 3.33       | 1.24       | 43.1                                                       | 12.4                                                             |
|       | 3.3        | 1.59       | 44                                                         | 12.8                                                             |
| 3     | 5.05       | 1.21       | 53.8                                                       | 15.4                                                             |
|       | 3.66       | 1.03       | 51.8                                                       | 14.4                                                             |
|       | 5.5        | 1.65       | 41.9                                                       | 12.7                                                             |
|       | 5.8        | 2.86       | 42.7                                                       | 13.2                                                             |
| 3     | 2.91       | 1.03       | 44.1                                                       | 12.9                                                             |
|       | 4.64       | 2.31       | 41.5                                                       | 13                                                               |
|       | 5.69       | 1.26       | 46.5                                                       | 13                                                               |
|       | 3.67       | 1.65       | 41.9                                                       | 12.1                                                             |
|       | 4.58       | 1.65       | 44.8                                                       | 13.7                                                             |
| 138   | 8          | 8.9        | 46.5                                                       | 13.3                                                             |
| 132   | 4.05       | 0.9        | 40.2                                                       | 14.4                                                             |
|       | 4.85       | 1.32       | 43.8                                                       | 12.5                                                             |
|       | 3.42       | 3.58       | 43.6                                                       | 12.9                                                             |
|       | 2.77       | 0.9        | 45.6                                                       | 13.4                                                             |
|       | 3.15       | 1.26       | 46.2                                                       | 13.1                                                             |
|       | 3.15       | 1.26       | 46.5                                                       | 13.61                                                            |
| 5.5   | 4.55       | 1.48       | 43.3                                                       | 12.5                                                             |
|       | 2.99       | 3.07       | 42.8                                                       | 13                                                               |
|       | 5.49       | 2.53       | 39.5                                                       | 12.3                                                             |
|       | 2.86       | 1.31       | 36.3                                                       | 17.1                                                             |
| 3     | 5.33       | 2.33       | 46.8                                                       | 14.7                                                             |
| 3     | 3.03       | 1.3        | 47.3                                                       | 13.2                                                             |
| 40.5  | 4.58       | 1.88       |                                                            |                                                                  |
| 18.3  | 4.76       | 1.3        | 47.5                                                       | 13.7                                                             |
|       | 4.82       | 2.71       | 38.1                                                       | 11.9                                                             |
| 3     | 3.99       | 1.36       | 42.3                                                       | 12.91                                                            |
|       | 4          | 1.1        | 46.3                                                       | 12.9                                                             |
| 10.4  | 4.94       | 0.64       | 60.9                                                       | 18.6                                                             |
|       | 3.75       | 1.9        | 42.8                                                       | 12.6                                                             |
| 3     | 5.78       | 2.55       | 40.2                                                       | 13.51.                                                           |
|       | 3.24       | 2.81       | 43                                                         | 12.6                                                             |
| 10.51 | 8.13       | 0.93       | 47.7                                                       | 14.2                                                             |
|       | 3.88       | 1.74       | 42.3                                                       | 13.3                                                             |
| 3     | 6.26       | 1.59       | 43.5                                                       | 13.1                                                             |
|       | 3.03       | 1.29       | 40.5                                                       | 12.4                                                             |
|       | 5.46       | 1.53       | 42.9                                                       | 12.7                                                             |
|       | 9.4        | 1.84       | 42                                                         | 12.5                                                             |
|       | 5.1        | 0.64       | 42.5                                                       | 13                                                               |
|       | 4.35       | 1.04       | 46.4                                                       | 14.7                                                             |
|       | 2.61       | 1.16       | 47.5                                                       | 13.1                                                             |
| 37.7  | 0.73       | 1.33       | 52.1                                                       | 14.5                                                             |
|       | 2.59       | 0.84       | 42.2                                                       | 12.2                                                             |
| 44.4  | 5.55       | 0.95       | 45.6                                                       | 13.9                                                             |
|       | 7.36       | 0.66       | 48.6                                                       | 17.1                                                             |

|       |      |      |      |      |
|-------|------|------|------|------|
|       | 7.93 | 2.24 | 40.3 | 11.8 |
|       | 8.36 | 2.02 | 48.3 | 14.6 |
|       | 4.28 | 1.36 | 39.9 | 12.8 |
|       | 4.38 | 1.43 | 40.9 | 12.5 |
|       | 3    | 1.5  | 46.3 | 14   |
| 1.62  | 3.62 | 1.13 | 39.7 | 12.3 |
|       | 3.85 | 1.72 | 39.7 | 11.9 |
|       | 3.77 | 1.19 | 43.2 | 12.5 |
|       | 3.35 | 1.05 | 47.2 | 13.6 |
|       | 4.36 | 0.64 | 42.5 | 12.8 |
|       | 5.41 | 2.13 | 38.4 | 12.6 |
|       | 5.07 | 2.27 | 41.5 | 13   |
| 38.65 | 7.1  | 1.94 | 38.2 | 12   |
|       | 3.54 | 2.07 | 41   | 12.4 |
| 3.14  | 3.91 | 1.86 | 36.1 | 12.9 |
|       | 2.5  | 1.41 | 36.7 | 15.8 |
|       | 2.6  | 1.32 | 38.4 | 12.4 |
|       | 2.69 | 1.02 | 48.8 | 13.2 |
|       | 6.13 | 2.49 | 40.3 | 12.2 |
|       | 5.32 | 1.22 | 40.7 | 13.1 |
|       | 3.42 | 1.39 | 45.2 | 12.8 |
|       | 5.5  | 1.4  | 40.6 | 13.1 |
|       | 2.12 | 1.64 | 49.3 | 13.3 |
|       | 4.55 | 0.99 | 42.4 | 12.8 |
|       | 6.48 | 1.89 | 36.9 | 12.3 |
|       | 2.6  | 1.77 | 37.5 | 11.1 |
|       | 4.68 | 2.02 | 41.7 | 12.6 |
|       | 3.08 | 0.94 | 47.3 | 14   |
|       | 2.74 | 2.04 | 40.5 | 12.2 |
|       | 3.91 | 2.32 | 43   | 13.1 |
|       | 3.52 | 2.29 | 45.9 | 13.4 |
| 1.52  | 2.5  | 1.7  | 44.3 | 13.4 |
| 39.5  | 5.05 | 0.96 | 44   | 13.4 |
|       | 4.03 | 1.72 | 42.4 | 14   |
|       | 6.34 | 2.94 |      |      |
|       | 4.58 | 1.61 | 40.8 | 12   |
|       | 4.75 | 1.21 | 48   | 13.9 |
| <3.14 | 3.07 | 1.57 | 40.8 | 11.8 |
|       | 3.36 | 1.54 | 42.9 | 12.3 |
|       | 4.15 | 1.67 | 42.1 | 13.9 |
|       | 3.34 | 1.11 | 42.8 | 13.1 |
|       | 6.15 | 2.47 | 40.9 | 12.7 |
|       | 4.58 | 2.27 | 45.6 | 13.2 |
|       | 4.08 | 1.01 | 43.4 | 13.3 |
|       | 5.19 | 2.37 | 44.9 | 13.3 |
| 15.2  | 6.57 | 1.4  | 44.1 | 14.1 |
| 2.8   | 3.32 | 1.33 | 47.1 | 13.9 |
|       | 4.42 | 1.86 | 45.6 | 13   |
|       | 4.38 | 2.34 | 41.7 | 13.1 |
|       | 3.09 | 1.44 | 45.5 | 13.4 |
|       | 4.59 | 0.95 | 45.5 | 12.6 |
|       | 5.06 | 0.73 | 45.7 | 14.7 |

|        |       |      |      |      |
|--------|-------|------|------|------|
| 12.21  | 4.77  | 1.17 | 48.5 | 13.3 |
|        | 8.64  | 1.1  | 39.7 | 12.2 |
|        | 3.25  | 2.11 | 41.4 | 13.1 |
| 138    | 6.94  | 0.98 | 41   | 13.2 |
| 2.32   | 6.1   | 0.54 | 43.9 | 12.9 |
|        | 3.54  | 2.3  | 43.3 | 13.6 |
|        | 3.25  | 0.96 | 44.7 | 12.6 |
|        | 5.07  | 1.69 | 42.1 | 13.2 |
| 23.9   | 4.77  | 1.13 | 38.5 | 11.6 |
|        | 5.52  | 1.44 | 43.5 | 12.5 |
|        | 38    | 1.03 | 41.2 | 12.6 |
|        | 2.69  | 2.64 | 41.1 | 13.1 |
|        | 4.83  | 1.79 | 44.2 | 13   |
|        | 3.01  | 2.6  | 48   | 13.9 |
|        | 4.24  | 2.03 |      |      |
| 3.8    | 10.25 | 0.86 | 44.5 | 13.5 |
|        | 2.78  | 1.22 | 39.9 | 12.3 |
| 1.64   | 7.55  | 1.72 | 41.1 | 12.7 |
|        | 5.54  | 1.94 | 48.8 | 14.3 |
|        | 4.66  | 3.37 | 43.7 | 13.5 |
| 10.86  | 4.87  | 0.81 | 47.9 | 14.1 |
|        | 3.96  | 1.87 | 40.7 | 12.2 |
|        | 4.12  | 1.68 | 51.1 | 14.4 |
| 8.46   | 3.22  | 1.51 |      |      |
|        | 4.71  | 1.85 | 42   | 13.3 |
|        | 2.82  | 0.92 | 45.6 | 13   |
|        | 4.91  | 1.12 | 37.5 | 11.6 |
|        | 5.89  | 1.29 | 38.5 | 12.9 |
|        | 4.46  | 1.7  | 48.2 | 16.7 |
|        | 5.19  | 1.56 | 39.7 | 12.2 |
|        | 3.07  | 1.59 | 55.7 | 15.4 |
|        | 2.86  | 0.91 | 44.3 | 13.5 |
| 4.43   | 6.64  | 3.12 | 41.7 | 13.3 |
| 2.49   | 4.04  | 2.24 | 47.1 | 12.8 |
| 62.68  | 4.89  | 2.43 | 45.1 | 13   |
| 39.22  | 5.65  | 1.01 | 45.5 | 13.2 |
|        | 4.86  | 1.36 | 42.7 | 12.7 |
| 5.14   | 4.26  | 1.42 | 44.5 | 12.3 |
| 111.21 | 6.58  | 1.15 | 40.7 | 12.6 |
|        | 4.04  | 1.65 |      |      |
|        | 6.95  | 2    | 37.3 | 11.6 |
|        | 3.61  | 1.09 |      |      |
| 2.43   | 3.2   | 1.35 | 42.5 | 13   |
|        | 3.12  | 0.46 | 49.7 | 14.6 |
|        | 12.87 | 1.2  | 39.5 | 12.5 |
|        | 3.37  | 1.86 | 40.6 | 12.4 |
|        | 3.02  | 0.56 | 43.5 | 13.1 |
|        | 4.91  | 2.1  | 41.6 | 12.7 |
|        | 7.4   | 1.27 |      |      |
|        | 4.58  | 1.59 | 41.5 | 12.2 |
|        | 4.39  | 1.36 | 41.1 | 13.2 |
|        | 3.96  | 2.39 | 43.8 | 13.6 |
| 25.59  | 8.58  | 1.76 | 48.8 | 14.5 |
|        | 6.16  | 2.1  | 42.8 | 13.1 |
| 0.321  | 4.72  | 1.28 |      |      |
| 92     | 4.99  | 1.87 | 42.9 | 12.4 |

|       |       |      |      |      |
|-------|-------|------|------|------|
|       | 3.43  | 0.75 | 42.9 | 13.8 |
|       | 6.9   | 1.72 | 40.2 | 12.2 |
|       | 6.75  | 1.28 | 39.5 | 12.5 |
| 17.5  | 4.23  | 2.09 | 37.8 | 12.5 |
| 3.39  | 3.98  | 1.13 | 39.9 | 13.2 |
|       | 1.97  | 1.12 | 48.4 | 13.8 |
|       | 2.73  | 2.39 | 42.5 | 12.1 |
| 7.37  | 4.03  | 0.95 |      |      |
|       | 4.72  | 1.98 | 40.4 | 12.2 |
|       | 4.44  | 2.06 |      |      |
|       | 3.98  | 3.08 | 39.6 | 12.8 |
|       | 3.41  | 1.03 |      |      |
| 2.4   | 3.18  | 1.08 | 43.4 | 13.1 |
| 59.1  | 5.69  | 1.66 | 42.1 | 13   |
|       | 2.78  | 1.58 | 45.5 | 13.5 |
|       | 2.8   | 1.35 | 41.2 | 12.4 |
|       | 4.61  | 1.76 | 43.7 | 12.9 |
|       | 3.85  | 1.18 | 41.4 | 12.8 |
| 4.28  | 4.06  | 1.47 | 40.7 | 12.7 |
|       | 5.52  | 2.51 | 40.8 | 13.2 |
| 7.14  | 5.19  | 2.58 | 41.2 | 12.6 |
|       | 4.09  | 2.12 | 41.5 | 12.3 |
|       | 4.06  | 1.44 | 49.6 | 13   |
| 0.331 | 4     | 2.13 | 52   | 15.8 |
| 1.95  | 3.62  | 2.51 | 46.1 | 13.6 |
|       | 3.27  | 2.47 | 39.8 | 11.8 |
|       | 2.61  | 2.38 |      |      |
|       | 3.98  | 1.02 | 43.2 | 13.1 |
|       | 3.37  | 1.77 | 41.5 | 12.2 |
| 45.5  | 11.32 | 1.85 | 41.7 | 12.9 |
|       | 2.31  | 1.47 | 40.2 | 12.6 |
|       | 5.2   | 1.82 | 43.4 | 13.5 |
| 0.31  | 3.89  | 2.2  | 41.6 | 12.2 |
|       | 3.46  | 1.26 | 39.7 | 11.8 |
| 1.86  | 5.18  | 1.06 | 46.6 | 13.4 |
|       | 4.27  | 3.1  | 41.8 | 12.2 |
|       | 4.32  | 1.81 | 44.7 | 13.6 |
|       | 5.82  | 2.16 | 53.9 | 15   |
|       | 3.28  | 1.06 | 38.8 | 12.4 |
|       | 2.69  | 1.01 | 39.6 | 12.2 |
|       | 3.23  | 1.81 | 40.5 | 11.4 |
| 3.54  | 5.52  | 1.86 | 40.9 | 12.3 |
| 3.25  | 3.45  | 1.02 | 41.3 | 12   |
|       | 5.6   | 1.42 | 43.6 | 14.2 |
| 1.44  | 8.67  | 1.64 | 38.9 | 12.7 |
|       | 5.68  | 2.23 | 43.1 | 12.3 |
| 2.41  | 5.21  | 1.83 | 45.3 | 12.9 |
|       | 5.12  | 1.94 |      |      |
|       | 6.58  | 3.4  | 44.4 | 13   |
| 19.53 | 3.44  | 1.23 | 44.1 | 13.3 |
|       | 3.82  | 1.98 |      |      |
| 2.57  | 3.88  | 0.89 |      |      |
